# Supplementary material for: In Vitro Metabolic Fate of the Synthetic Cannabinoid Receptor Agonists QMPSB and QMPCB (SGT-11) Including Isozyme Mapping and Esterase Activity
Source: MDPI journal article supplement (doi:10.3390/metabo11080509), 2021-08-03
Supplement: s1 [file s1]

Supplementary materials

# **In Vitro Metabolic Fate of the Synthetic Cannabinoid Receptor Agonists QMPSB and QMPCB (SGT-11) Including Isozyme Mapping and Esterase Activity**

**Matthias J. Richter**<sup>1</sup>, **Lea Wagmann**<sup>1</sup>, **Tanja M. Gampfer**<sup>1</sup>, **Simon D. Brandt**<sup>2</sup> and **Markus R. Meyer**<sup>1,\*</sup>

<sup>1</sup> Department of Experimental and Clinical Toxicology, Institute of Experimental and Clinical Pharmacology and Toxicology, Center for Molecular Signaling (PZMS), Saarland University, 66421 Homburg, Germany; Matthias.Richter@uks.eu (M.J.R.), Lea.Wagmann@uks.eu (L.W.), Tanja.Gampfer@uks.eu (T.M.G.)

<sup>2</sup> School of Pharmacy and Biomolecular Sciences, Liverpool John Moores University, Liverpool L3 3AF, UK; s.brandt@ljmu.ac.uk

\* Correspondence: markus.meyer@uks.eu; Tel.: +49-6841-16-26438

**Table S1.** List of QMPSB and all detected QMPSB metabolites with incubation type and the ESI mode they were detected in, precursor ion (PI) and characteristic fragment ions (FI) masses in MS<sup>2</sup>, relative intensities in MS<sup>2</sup>, calculated exact masses, elemental composition, and deviation from measured to calculated masses, and retention time (RT). pos, positive ionization mode; neg, negative ionization mode; gluc, glucuronic acid.

| Meta-bolite ID | Metabolite             | Incuba-tion   | ESI Mode | Measured Masses of Characteristic Ions, <i>m/z</i> |          | Relative Intensity in MS <sup>2</sup> , % | Calculated Exact Masses, <i>m/z</i> | Elemental Composition | Error, ppm | RT, min |
|----------------|------------------------|---------------|----------|----------------------------------------------------|----------|-------------------------------------------|-------------------------------------|-----------------------|------------|---------|
| QMPSB          | -                      | pHLS9/<br>CYP | pos      | PI at <i>m/z</i>                                   | 411.1375 | 28                                        | 411.1373                            | C22H23O4N2S           | 0.48       | 9.4     |
|                |                        |               |          | FI at <i>m/z</i>                                   | 266.0846 | 100                                       | 266.0845                            | C13H16O3NS            | 0.23       |         |
|                |                        |               |          | FI at <i>m/z</i>                                   | 183.0111 | 32                                        | 183.0110                            | C8H7O3S               | 0.33       |         |
|                |                        |               |          | FI at <i>m/z</i>                                   | 135.0442 | 26                                        | 135.0441                            | C8H7O2                | 1.07       |         |
|                |                        |               |          | FI at <i>m/z</i>                                   | 119.0494 | 41                                        | 119.0491                            | C8H7O                 | 2.18       |         |
|                |                        |               |          | FI at <i>m/z</i>                                   | 91.0548  | 17                                        | 91.0542                             | C7H7                  | 6.29       |         |
| SM1            | <i>N,N</i> -bisdealkyl | CYP           | pos      | PI at <i>m/z</i>                                   | 343.0745 | 16                                        | 343.0747                            | C17H15O4N2S           | -0.59      | 7.6     |
|                |                        |               |          | FI at <i>m/z</i>                                   | 198.0220 | 100                                       | 198.0219                            | C8H8O3NS              | 0.30       |         |
|                |                        |               |          | FI at <i>m/z</i>                                   | 180.9954 | 29                                        | 180.9954                            | C8H5O3S               | 0.06       |         |
|                |                        |               |          | FI at <i>m/z</i>                                   | 153.0005 | 16                                        | 153.0005                            | C7H5O2S               | 0.16       |         |
| SM2            | dehydro (isomer 1)     | CYP           | pos      | PI at <i>m/z</i>                                   | 409.1218 | 22                                        | 409.1217                            | C22H21O4N2S           | 0.36       | 8.8     |
|                |                        |               |          | FI at <i>m/z</i>                                   | 264.0689 | 100                                       | 264.0689                            | C13H14O3NS            | 0.04       |         |
|                |                        |               |          | FI at <i>m/z</i>                                   | 183.0111 | 14                                        | 183.0110                            | C8H7O3S               | 0.33       |         |
|                |                        |               |          | FI at <i>m/z</i>                                   | 83.0736  | 45                                        | 83.0730                             | C5H9N                 | 7.81       |         |
| SM3            | dehydro (isomer 2)     | CYP           | pos      | PI at <i>m/z</i>                                   | 409.1219 | 25                                        | 409.1217                            | C22H21O4N2S           | 0.60       | 9.5     |
|                |                        |               |          | FI at <i>m/z</i>                                   | 264.0690 | 100                                       | 264.0689                            | C13H14O3NS            | 0.42       |         |
|                |                        |               |          | FI at <i>m/z</i>                                   | 183.0112 | 14                                        | 183.0110                            | C8H7O3S               | 0.87       |         |
|                |                        |               |          | FI at <i>m/z</i>                                   | 83.0736  | 43                                        | 83.0730                             | C5H9N                 | 7.81       |         |
| SM4            | hydroxy + dehydro      | CYP           | pos      | PI at <i>m/z</i>                                   | 425.1169 | 31                                        | 425.1166                            | C22H21O5N2S           | 0.78       | 8.1     |
|                |                        |               |          | FI at <i>m/z</i>                                   | 264.0693 | 100                                       | 264.0689                            | C13H14O3NS            | 1.55       |         |
|                |                        |               |          | FI at <i>m/z</i>                                   | 183.0112 | 15                                        | 183.0110                            | C8H7O3S               | 0.87       |         |
|                |                        |               |          | FI at <i>m/z</i>                                   | 119.0496 | 12                                        | 119.0491                            | C8H7O                 | 3.86       |         |
|                |                        |               |          | FI at <i>m/z</i>                                   | 83.0737  | 47                                        | 83.0730                             | C5H9ON                | 9.02       |         |
| SM5            | hydroxy (isomer 1)     | CYP           | pos      | PI at <i>m/z</i>                                   | 427.1328 | 62                                        | 427.1322                            | C22H23O5N2S           | 1.36       | 8.2     |
|                |                        |               |          | FI at <i>m/z</i>                                   | 300.0901 | 100                                       | 300.0900                            | C13H16O5NS            | 0.27       |         |
|                |                        |               |          | FI at <i>m/z</i>                                   | 282.0796 | 38                                        | 282.0795                            | C13H16O4NS            | 0.52       |         |
|                |                        |               |          | FI at <i>m/z</i>                                   | 199.0061 | 39                                        | 199.0060                            | C8H7O4S               | 0.73       |         |
|                |                        |               |          | FI at <i>m/z</i>                                   | 163.0503 | 77                                        | 163.0502                            | C8H7O2N2              | 0.59       |         |
|                |                        |               |          | FI at <i>m/z</i>                                   | 135.0442 | 83                                        | 135.0441                            | C8H7O2                | 1.07       |         |
|                |                        |               |          | FI at <i>m/z</i>                                   | 107.0496 | 43                                        | 107.0491                            | C7H7O                 | 4.29       |         |
|                |                        |               |          | FI at <i>m/z</i>                                   | 91.0548  | 26                                        | 91.0542                             | C7H7                  | 6.29       |         |

**Table S1.** (continued)

| Meta-bolite ID | Metabolite                                                  | Incubation    | ESI Mode | Measured Masses of Characteristic Ions, <i>m/z</i> |          | Relative Intensity in MS <sup>2</sup> , % | Calculated Exact Masses, <i>m/z</i> | Elemental Composition | Error, ppm | RT, min |
|----------------|-------------------------------------------------------------|---------------|----------|----------------------------------------------------|----------|-------------------------------------------|-------------------------------------|-----------------------|------------|---------|
| SM6            | hydroxy (isomer 2)                                          | CYP           | pos      | PI at <i>m/z</i>                                   | 427.1326 | 41                                        | 427.1322                            | C22H23O5N2S           | 0.89       | 8.8     |
|                |                                                             |               |          | FI at <i>m/z</i>                                   | 266.0850 | 100                                       | 266.0845                            | C13H16O3NS            | 1.73       |         |
|                |                                                             |               |          | FI at <i>m/z</i>                                   | 183.0113 | 31                                        | 183.0110                            | C8H7O3S               | 1.42       |         |
|                |                                                             |               |          | FI at <i>m/z</i>                                   | 135.0443 | 23                                        | 135.0441                            | C8H7O2                | 1.81       |         |
|                |                                                             |               |          | FI at <i>m/z</i>                                   | 119.0496 | 38                                        | 119.0491                            | C8H7O                 | 3.86       |         |
|                |                                                             |               |          | FI at <i>m/z</i>                                   | 91.0549  | 15                                        | 91.0542                             | C7H7                  | 7.39       |         |
| SM7            | dihydroxy (isomer 1)                                        | CYP           | pos      | PI at <i>m/z</i>                                   | 443.1276 | 50                                        | 443.1271                            | C22H23O6N2S           | 1.05       | 8.1     |
|                |                                                             |               |          | FI at <i>m/z</i>                                   | 298.0745 | 37                                        | 298.0744                            | C13H16O5NS            | 0.44       |         |
|                |                                                             |               |          | FI at <i>m/z</i>                                   | 199.0060 | 100                                       | 199.0060                            | C8H7O4S               | 0.23       |         |
|                |                                                             |               |          | FI at <i>m/z</i>                                   | 163.0503 | 54                                        | 163.0502                            | C8H7O2N2              | 0.59       |         |
|                |                                                             |               |          | FI at <i>m/z</i>                                   | 135.0442 | 73                                        | 135.0441                            | C8H7O2                | 1.07       |         |
|                |                                                             |               |          | FI at <i>m/z</i>                                   | 107.0496 | 57                                        | 107.0491                            | C7H7O                 | 4.29       |         |
| SM8            | dihydroxy (isomer 2)                                        | CYP           | pos      | PI at <i>m/z</i>                                   | 443.1290 | 28                                        | 443.1271                            | C22H23O6N2S           | 4.21       | 8.1     |
|                |                                                             |               |          | FI at <i>m/z</i>                                   | 264.0695 | 100                                       | 264.0689                            | C13H14O3NS            | 2.31       |         |
|                |                                                             |               |          | FI at <i>m/z</i>                                   | 183.0113 | 16                                        | 183.0110                            | C8H7O3S               | 1.42       |         |
|                |                                                             |               |          | FI at <i>m/z</i>                                   | 162.0554 | 50                                        | 162.0550                            | C9H8O2N               | 2.75       |         |
|                |                                                             |               |          | FI at <i>m/z</i>                                   | 83.0738  | 47                                        | 83.0730                             | C5H9N                 | 10.22      |         |
| SM9            | ester hydrolysis (carboxylic acid)                          | pHLS9/<br>CYP | pos      | PI at <i>m/z</i>                                   | 284.0952 | 47                                        | 284.0951                            | C13H18O4NS            | 0.34       | 7.9     |
|                |                                                             |               |          | FI at <i>m/z</i>                                   | 135.0442 | 8                                         | 135.0441                            | C8H7O2                | 1.07       |         |
|                |                                                             |               |          | FI at <i>m/z</i>                                   | 85.0892  | 37                                        | 85.0886                             | C5H11N                | 7.04       |         |
|                |                                                             |               |          | FI at <i>m/z</i>                                   | 84.0814  | 100                                       | 84.0808                             | C5H10N                | 7.42       |         |
|                |                                                             | pHLS9/<br>CYP | neg      | PI at <i>m/z</i>                                   | 282.0805 | 20                                        | 282.0806                            | C13H16O4NS            | -0.18      |         |
|                |                                                             |               |          | FI at <i>m/z</i>                                   | 238.0904 | 8                                         | 238.0907                            | C12H16O2NS            | -1.35      |         |
|                |                                                             |               |          | FI at <i>m/z</i>                                   | 148.0426 | 100                                       | 148.0438                            | C5H10O2NS             | -7.92      |         |
| SM10           | ester hydrolysis (carboxylic acid) + <i>N,N</i> -bisdealkyl | CYP           | neg      | PI at <i>m/z</i>                                   | 214.0173 | 23                                        | 214.0180                            | C8H8O4NS              | -3.04      | 5.0     |
|                |                                                             |               |          | FI at <i>m/z</i>                                   | 170.0271 | 48                                        | 170.0281                            | C7H8O2NS              | -6.01      |         |
|                |                                                             |               |          | FI at <i>m/z</i>                                   | 79.9797  | 100                                       | 79.981172                           | H2O2NS                | -18.40     |         |
| SM11           | ester hydrolysis (carboxylic acid) + dehydro                | pHLS9/<br>CYP | neg      | PI at <i>m/z</i>                                   | 280.0642 | 34                                        | 280.0649                            | C13H14O4NS            | -2.51      | 8.0     |
|                |                                                             |               |          | FI at <i>m/z</i>                                   | 146.0269 | 100                                       | 146.0281                            | C5H8O2NS              | -8.37      |         |
|                |                                                             |               |          | FI at <i>m/z</i>                                   | 63.9610  | 39                                        | 63.9624                             | O2S                   | -22.64     |         |
| SM12           | ester hydrolysis (carboxylic acid) + hydroxy (isomer 1)     | pHLS9/<br>CYP | neg      | PI at <i>m/z</i>                                   | 298.0751 | 47                                        | 298.0755                            | C13H16O5NS            | -1.23      | 6.4     |
|                |                                                             |               |          | FI at <i>m/z</i>                                   | 155.0161 | 100                                       | 155.0172                            | C7H7O2S               | -7.24      |         |
|                |                                                             |               |          | FI at <i>m/z</i>                                   | 63.9611  | 14                                        | 63.9624                             | O2S                   | -21.07     |         |

Table S1. (continued)

| Meta-bolite ID | Metabolite                                              | Incubation    | ESI Mode | Measured Masses of Characteristic Ions, <i>m/z</i> |              | Relative Intensity in MS <sup>2</sup> , % | Calculated Exact Masses, <i>m/z</i> | Elemental Composition | Error, ppm | RT, min |
|----------------|---------------------------------------------------------|---------------|----------|----------------------------------------------------|--------------|-------------------------------------------|-------------------------------------|-----------------------|------------|---------|
| SM13           | ester hydrolysis (carboxylic acid) + hydroxy (isomer 2) | CYP           | neg      | PI at <i>m/z</i>                                   | 298.0758     | 44                                        | 298.0755                            | C13H16O5NS            | 1.12       | 6.6     |
|                |                                                         |               |          | FI at <i>m/z</i>                                   | 148.0425     | 100                                       | 148.0438                            | C5H10O2NS             | -8.59      |         |
| SM14           | ester hydrolysis (carboxylic acid) + hydroxy (isomer 3) | CYP           | neg      | PI at <i>m/z</i>                                   | 298.0753     | 82                                        | 298.0755                            | C13H16O5NS            | -0.56      | 7.0     |
|                |                                                         |               |          | FI at <i>m/z</i>                                   | 254.0855     | 100                                       | 254.0856                            | C12H16O3NS            | -0.54      |         |
|                |                                                         |               |          | FI at <i>m/z</i>                                   | 170.0271     | 94                                        | 170.0281                            | C7H8O2NS              | -6.01      |         |
|                |                                                         |               |          | FI at <i>m/z</i>                                   | 155.0159     | 35                                        | 155.0172                            | C7H7O2S               | -8.53      |         |
|                |                                                         |               |          | FI at <i>m/z</i>                                   | 100.0753     | 33                                        | 100.0768                            | C5H10ON               | -14.87     |         |
| SM15           | ester hydrolysis (carboxylic acid) + dihydroxy          | pHLS9/<br>CYP | neg      | PI at <i>m/z</i>                                   | 314.0702     | 41                                        | 314.0704                            | C13H16O6NS            | -0.58      | 6.2     |
|                |                                                         |               |          | FI at <i>m/z</i>                                   | 270.0801     | 4                                         | 270.0806                            | C12H16O4NS            | -1.67      |         |
|                |                                                         |               |          | FI at <i>m/z</i>                                   | 170.0270     | 100                                       | 170.0281                            | C7H8O2NS              | -6.60      |         |
| SM16           | ester hydrolysis (carboxylic acid) + gluc               | pHLS9         | pos      | PI at <i>m/z</i>                                   | Not detected | 0                                         | 460.1272                            | C19H26O10NS           | -          | 6.9     |
|                |                                                         |               |          | FI at <i>m/z</i>                                   | 284.0949     | 100                                       | 284.0951                            | C13H18O4NS            | -0.72      |         |
|                |                                                         |               |          | FI at <i>m/z</i>                                   | 135.0443     | 7                                         | 135.0441                            | C8H7O2                | 1.81       |         |
|                |                                                         |               |          | FI at <i>m/z</i>                                   | 85.0892      | 32                                        | 85.0886                             | C5H11N                | 7.04       |         |
|                |                                                         |               |          | FI at <i>m/z</i>                                   | 84.0814      | 90                                        | 84.0808                             | C5H10N                | 7.42       |         |
|                |                                                         | pHLS9         | neg      | PI at <i>m/z</i>                                   | 458.1134     | 3                                         | 458.1126                            | C19H24O10NS           | 1.66       |         |
|                |                                                         |               |          | FI at <i>m/z</i>                                   | 282.0807     | 47                                        | 282.0806                            | C13H16O4NS            | 0.52       |         |
|                |                                                         |               |          | FI at <i>m/z</i>                                   | 238.0909     | 14                                        | 238.0907                            | C12H16O2NS            | 0.75       |         |
|                |                                                         |               |          | FI at <i>m/z</i>                                   | 148.0425     | 100                                       | 148.0438                            | C5H10O2NS             | -8.59      |         |
|                |                                                         |               |          | FI at <i>m/z</i>                                   | 113.0231     | 41                                        | 113.0244                            | C5H5O3                | -11.66     |         |
|                |                                                         |               |          | FI at <i>m/z</i>                                   | 85.0281      | 38                                        | 85.0295                             | C4H5O2                | -16.50     |         |
| SM17           | ester hydrolysis (carboxylic acid) + dihydroxy + gluc   | pHLS9         | neg      | PI at <i>m/z</i>                                   | Not detected | 0                                         | 490.1025                            | C19H24O12NS           | -          | 5.6     |
|                |                                                         |               |          | FI at <i>m/z</i>                                   | 314.0704     | 73                                        | 314.0704                            | C13H16O6NS            | 0.06       |         |
|                |                                                         |               |          | FI at <i>m/z</i>                                   | 170.0271     | 100                                       | 170.0281                            | C7H8O2NS              | -6.01      |         |
| SM18           | ester hydrolysis (8-hydroxyquinoline)                   | pHLS9/<br>CYP | pos      | PI at <i>m/z</i>                                   | 146.0603     | 100                                       | 146.0600                            | C9H8ON                | 1.78       | 2.2     |
|                |                                                         |               |          | FI at <i>m/z</i>                                   | 118.0655     | 11                                        | 118.0651                            | C8H8N                 | 3.17       |         |
| SM19           | ester hydrolysis (8-hydroxyquinoline) + hydroxy         | CYP           | pos      | PI at <i>m/z</i>                                   | 162.0551     | 100                                       | 162.0550                            | C9H8O2N               | 0.89       | 1.3     |
|                |                                                         |               |          | FI at <i>m/z</i>                                   | 134.0602     | 7                                         | 134.0600                            | C8H8ON                | 1.19       |         |
| SM20           | ester hydrolysis (8-hydroxyquinoline) + sulfate         | pHLS9         | pos      | PI at <i>m/z</i>                                   | 226.0169     | 12                                        | 226.0169                            | C9H8O4NS              | 0.20       | 2.2     |
|                |                                                         |               |          | FI at <i>m/z</i>                                   | 146.0601     | 100                                       | 146.0600                            | C9H8ON                | 0.41       |         |
|                |                                                         |               |          | FI at <i>m/z</i>                                   | 133.0286     | 26                                        | 133.0284                            | C8H5O2                | 1.46       |         |
| SM21           | ester hydrolysis (8-hydroxyquinoline) + gluc            | pHLS9         | pos      | PI at <i>m/z</i>                                   | 322.0919     | 11                                        | 322.0921                            | C15H16O7N             | -0.71      | 1.5     |
|                |                                                         |               |          | FI at <i>m/z</i>                                   | 146.0601     | 100                                       | 146.0600                            | C9H8ON                | 0.41       |         |
|                |                                                         |               |          | FI at <i>m/z</i>                                   | 113.0236     | 4                                         | 113.0233                            | C5H5O3                | 2.48       |         |
|                |                                                         |               |          | FI at <i>m/z</i>                                   | 85.0290      | 7                                         | 85.0295                             | C4H5O2                | -5.92      |         |

**Table S2.** List of QMPCB and all detected QMPCB metabolites with incubation type and the ESI mode they were detected in, precursor ion (PI) and characteristic fragment ions (FI) masses in MS<sup>2</sup>, relative intensities in MS<sup>2</sup>, calculated exact masses, elemental composition, and deviation from measured to calculated masses, and retention time (RT). pos, positive ionization mode; neg, negative ionization mode; gluc, glucuronic acid.

| Meta-bolite ID | Metabolite                             | Incuba-tion   | ESI Mode | Measured Masses of Characteristic Ions, <i>m/z</i> |          | Relative Intensity in MS <sup>2</sup> , % | Calculated Exact Masses, <i>m/z</i> | Elemental Composition | Error, ppm | RT, min |
|----------------|----------------------------------------|---------------|----------|----------------------------------------------------|----------|-------------------------------------------|-------------------------------------|-----------------------|------------|---------|
| QMPCB          | -                                      | pHLS9/<br>CYP | pos      | PI at <i>m/z</i>                                   | 375.1696 | 8                                         | 375.1703                            | C23H23O3N2            | -1.92      | 8.7     |
|                |                                        |               |          | FI at <i>m/z</i>                                   | 230.1172 | 100                                       | 230.1176                            | C14H16O2N             | -1.54      |         |
|                |                                        |               |          | FI at <i>m/z</i>                                   | 147.0437 | 13                                        | 147.0441                            | C9H7O2                | -2.42      |         |
|                |                                        |               |          | FI at <i>m/z</i>                                   | 145.0282 | 73                                        | 145.0284                            | C9H5O2                | -1.42      |         |
|                |                                        |               |          | FI at <i>m/z</i>                                   | 117.0336 | 5                                         | 117.0335                            | C8H5O                 | 0.93       |         |
|                |                                        |               |          | FI at <i>m/z</i>                                   | 89.0390  | 3                                         | 89.0386                             | C7H5                  | 4.75       |         |
| CM1            | <i>N,N</i> -bisdealkyl                 | CYP           | pos      | PI at <i>m/z</i>                                   | 307.1073 | 6                                         | 307.1077                            | C18H15O3N2            | -1.36      | 7.2     |
|                |                                        |               |          | FI at <i>m/z</i>                                   | 162.0547 | 100                                       | 162.0550                            | C9H8O2N               | -1.57      |         |
|                |                                        |               |          | FI at <i>m/z</i>                                   | 145.0282 | 50                                        | 145.0284                            | C9H5O2                | -1.42      |         |
|                |                                        |               |          | FI at <i>m/z</i>                                   | 117.0335 | 4                                         | 117.0335                            | C8H5O                 | 0.08       |         |
| CM2            | carboxamide cleavage (carboxylic acid) | CYP           | pos      | PI at <i>m/z</i>                                   | 308.0916 | 6                                         | 308.0917                            | C18H14O4N             | -0.43      | 8.0     |
|                |                                        |               |          | FI at <i>m/z</i>                                   | 163.0387 | 100                                       | 163.0390                            | C9H7O3                | -1.66      |         |
|                |                                        |               |          | FI at <i>m/z</i>                                   | 135.0439 | 11                                        | 135.0441                            | C8H7O2                | -1.16      |         |
| CM3            | <i>N,N</i> -bisdealkyl + hydroxy       | CYP           | pos      | PI at <i>m/z</i>                                   | 323.1021 | 16                                        | 323.1026                            | C18H15O4N2            | -1.65      | 6.5     |
|                |                                        |               |          | FI at <i>m/z</i>                                   | 178.0497 | 100                                       | 178.0499                            | C9H8O3N               | -0.95      |         |
|                |                                        |               |          | FI at <i>m/z</i>                                   | 161.0231 | 69                                        | 161.0233                            | C9H5O3                | -1.37      |         |
|                |                                        |               |          | FI at <i>m/z</i>                                   | 133.0286 | 16                                        | 133.0284                            | C8H5O2                | 1.46       |         |
| CM4            | hydroxy + didehydro                    | CYP           | pos      | PI at <i>m/z</i>                                   | 387.1337 | 21                                        | 387.1339                            | C23H19O4N2            | -0.60      | 8.1     |
|                |                                        |               |          | FI at <i>m/z</i>                                   | 242.0811 | 100                                       | 242.0812                            | C14H12O3N             | -0.29      |         |
|                |                                        |               |          | FI at <i>m/z</i>                                   | 145.0284 | 83                                        | 145.0284                            | C9H5O2                | -0.04      |         |
|                |                                        |               |          | FI at <i>m/z</i>                                   | 117.0339 | 9                                         | 117.0335                            | C8H5O                 | 3.49       |         |
| CM5            | hydroxy + dehydro (isomer 1)           | CYP           | pos      | PI at <i>m/z</i>                                   | 389.1493 | 5                                         | 389.1496                            | C23H21O4N2            | -0.73      | 7.1     |
|                |                                        |               |          | FI at <i>m/z</i>                                   | 371.1382 | 18                                        | 371.1390                            | C23H19O3N2            | -2.21      |         |
|                |                                        |               |          | FI at <i>m/z</i>                                   | 308.0909 | 26                                        | 308.0917                            | C18H14O4N             | -2.71      |         |
|                |                                        |               |          | FI at <i>m/z</i>                                   | 244.0965 | 62                                        | 244.0968                            | C14H14O3N             | -1.31      |         |
|                |                                        |               |          | FI at <i>m/z</i>                                   | 226.0860 | 21                                        | 226.0863                            | C14H12O2N             | -1.13      |         |
|                |                                        |               |          | FI at <i>m/z</i>                                   | 163.0387 | 61                                        | 163.0390                            | C9H7O3                | -1.66      |         |
|                |                                        |               |          | FI at <i>m/z</i>                                   | 145.0282 | 100                                       | 145.0284                            | C9H5O2                | -1.42      |         |
| CM6            | hydroxy + dehydro (isomer 2)           | CYP           | pos      | PI at <i>m/z</i>                                   | 389.1497 | 16                                        | 389.1496                            | C23H21O4N2            | 0.30       | 7.4     |
|                |                                        |               |          | FI at <i>m/z</i>                                   | 228.1016 | 99                                        | 228.1019                            | C14H14O2N             | -1.34      |         |
|                |                                        |               |          | FI at <i>m/z</i>                                   | 145.0283 | 100                                       | 145.0284                            | C9H5O2                | -0.73      |         |
|                |                                        |               |          | FI at <i>m/z</i>                                   | 117.0336 | 8                                         | 117.0335                            | C8H5O                 | 0.93       |         |

Table S2. (continued)

| Meta-bolite ID | Metabolite                     | Incubation | ESI Mode | Measured Masses of Characteristic Ions, $m/z$ |          | Relative Intensity in MS <sup>2</sup> , % | Calculated Exact Masses, $m/z$ | Elemental Composition | Error, ppm | RT, min |
|----------------|--------------------------------|------------|----------|-----------------------------------------------|----------|-------------------------------------------|--------------------------------|-----------------------|------------|---------|
| CM7            | hydroxy + dehydro (isomer 3)   | CYP        | pos      | PI at $m/z$                                   | 389.1492 | 22                                        | 389.1496                       | C23H21O4N2            | -0.99      | 8.6     |
|                |                                |            |          | FI at $m/z$                                   | 244.0962 | 100                                       | 244.0968                       | C14H14O3N             | -2.54      |         |
|                |                                |            |          | FI at $m/z$                                   | 161.0231 | 19                                        | 161.0233                       | C9H5O3                | -1.37      |         |
|                |                                |            |          | FI at $m/z$                                   | 105.0336 | 26                                        | 105.0335                       | C7H5O                 | 1.04       |         |
|                |                                |            |          | FI at $m/z$                                   | 84.0811  | 18                                        | 84.0808                        | C5H10N                | 3.85       |         |
| CM8            | hydroxy (isomer 1)             | CYP        | pos      | PI at $m/z$                                   | 391.1645 | 10                                        | 391.1652                       | C23H23O4N2            | -1.88      | 7.3     |
|                |                                |            |          | FI at $m/z$                                   | 246.1121 | 100                                       | 246.1125                       | C14H16O3N             | -1.50      |         |
|                |                                |            |          | FI at $m/z$                                   | 145.0282 | 76                                        | 145.0284                       | C9H5O2                | -1.42      |         |
|                |                                |            |          | FI at $m/z$                                   | 117.0336 | 6                                         | 117.0335                       | C8H5O                 | 0.93       |         |
| CM9            | hydroxy (isomer 2)             | CYP        | pos      | PI at $m/z$                                   | 391.1671 | 4                                         | 391.1652                       | C25H29O3N             | 4.77       | 7.3     |
|                |                                |            |          | FI at $m/z$                                   | 246.1123 | 38                                        | 246.1125                       | C14H16O3N             | -0.69      |         |
|                |                                |            |          | FI at $m/z$                                   | 149.0233 | 100                                       | 149.0233                       | C8H5O3                | -0.13      |         |
|                |                                |            |          | FI at $m/z$                                   | 71.0863  | 12                                        | 71.0855                        | C5H11                 | 10.87      |         |
| CM10           | hydroxy (isomer 3)             | CYP        | pos      | PI at $m/z$                                   | 391.1648 | 14                                        | 391.1652                       | C23H23O4N2            | -1.11      | 7.6     |
|                |                                |            |          | FI at $m/z$                                   | 264.1227 | 100                                       | 264.1230                       | C14H18O4N             | -1.26      |         |
|                |                                |            |          | FI at $m/z$                                   | 246.1122 | 30                                        | 246.1125                       | C14H16O3N             | -1.10      |         |
|                |                                |            |          | FI at $m/z$                                   | 163.0386 | 16                                        | 163.0390                       | C9H7O3                | -2.27      |         |
|                |                                |            |          | FI at $m/z$                                   | 145.0282 | 90                                        | 145.0284                       | C9H5O2                | -1.42      |         |
|                |                                |            |          | FI at $m/z$                                   | 117.0337 | 7                                         | 117.0335                       | C8H5O                 | 1.79       |         |
| CM11           | hydroxy (isomer 4)             | CYP        | pos      | PI at $m/z$                                   | 391.1645 | 12                                        | 391.1652                       | C23H23O4N2            | -1.88      | 8.0     |
|                |                                |            |          | FI at $m/z$                                   | 230.1172 | 100                                       | 230.1176                       | C14H16O2N             | -1.54      |         |
|                |                                |            |          | FI at $m/z$                                   | 145.0282 | 76                                        | 145.0284                       | C9H5O2                | -1.42      |         |
|                |                                |            |          | FI at $m/z$                                   | 117.0336 | 5                                         | 117.0335                       | C8H5O                 | 0.93       |         |
| CM12           | dihydroxy + dehydro (isomer 1) | CYP        | pos      | PI at $m/z$                                   | 405.1437 | 19                                        | 405.1445                       | C23H21O5N2            | -1.97      | 7.2     |
|                |                                |            |          | FI at $m/z$                                   | 308.0910 | 13                                        | 308.0917                       | C18H14O4N             | -2.38      |         |
|                |                                |            |          | FI at $m/z$                                   | 163.0386 | 100                                       | 163.0390                       | C9H7O3                | -2.27      |         |
|                |                                |            |          | FI at $m/z$                                   | 145.0281 | 52                                        | 145.0284                       | C9H5O2                | -2.11      |         |
|                |                                |            |          | FI at $m/z$                                   | 117.0335 | 6                                         | 117.0335                       | C8H5O                 | 0.08       |         |
| CM13           | dihydroxy + dehydro (isomer 2) | CYP        | pos      | PI at $m/z$                                   | 405.1437 | 24                                        | 405.1445                       | C23H21O5N2            | -1.97      | 7.6     |
|                |                                |            |          | FI at $m/z$                                   | 278.1022 | 100                                       | 278.1023                       | C14H16O5N             | -0.36      |         |
|                |                                |            |          | FI at $m/z$                                   | 260.0922 | 3                                         | 260.0917                       | C14H14O4N             | 1.79       |         |
|                |                                |            |          | FI at $m/z$                                   | 163.0387 | 10                                        | 163.0390                       | C9H7O3                | -1.66      |         |
|                |                                |            |          | FI at $m/z$                                   | 145.0284 | 67                                        | 145.0284                       | C9H5O2                | -0.04      |         |
|                |                                |            |          | FI at $m/z$                                   | 117.0334 | 6                                         | 117.0335                       | C8H5O                 | -0.78      |         |

**Table S2.** (continued)

| Meta-bolite ID | Metabolite                                                  | Incubation    | ESI Mode | Measured Masses of Characteristic Ions, <i>m/z</i> |          | Relative Intensity in MS <sup>2</sup> , % | Calculated Exact Masses, <i>m/z</i> | Elemental Composition | Error, ppm | RT, min |
|----------------|-------------------------------------------------------------|---------------|----------|----------------------------------------------------|----------|-------------------------------------------|-------------------------------------|-----------------------|------------|---------|
| CM14           | dihydroxy (isomer 1)                                        | CYP           | pos      | PI at <i>m/z</i>                                   | 407.1592 | 15                                        | 407.1601                            | C23H23O5N2            | -2.33      | 6.6     |
|                |                                                             |               |          | FI at <i>m/z</i>                                   | 246.1122 | 100                                       | 246.1125                            | C14H16O3N             | -1.10      |         |
|                |                                                             |               |          | FI at <i>m/z</i>                                   | 145.0282 | 78                                        | 145.0284                            | C9H5O2                | -1.42      |         |
|                |                                                             |               |          | FI at <i>m/z</i>                                   | 117.0336 | 6                                         | 117.0335                            | C8H5O                 | 0.93       |         |
| CM15           | dihydroxy (isomer 2)                                        | CYP           | pos      | PI at <i>m/z</i>                                   | 407.1594 | 19                                        | 407.1601                            | C23H23O5N2            | -1.84      | 6.9     |
|                |                                                             |               |          | FI at <i>m/z</i>                                   | 264.1229 | 100                                       | 264.1230                            | C14H18O4N             | -0.51      |         |
|                |                                                             |               |          | FI at <i>m/z</i>                                   | 246.1119 | 16                                        | 246.1125                            | C14H16O3N             | -2.32      |         |
|                |                                                             |               |          | FI at <i>m/z</i>                                   | 163.0390 | 15                                        | 163.0390                            | C9H7O3                | 0.18       |         |
|                |                                                             |               |          | FI at <i>m/z</i>                                   | 145.0283 | 94                                        | 145.0284                            | C9H5O2                | -0.73      |         |
|                |                                                             |               |          | FI at <i>m/z</i>                                   | 117.0337 | 8                                         | 117.0335                            | C8H5O                 | 1.79       |         |
| CM16           | dihydroxy (isomer 3)                                        | CYP           | pos      | PI at <i>m/z</i>                                   | 407.1596 | 9                                         | 407.1601                            | C23H23O5N2            | -1.35      | 7.6     |
|                |                                                             |               |          | FI at <i>m/z</i>                                   | 262.1062 | 1                                         | 262.1074                            | C14H16O4N             | -4.52      |         |
|                |                                                             |               |          | FI at <i>m/z</i>                                   | 163.0387 | 100                                       | 163.0390                            | C9H7O3                | -1.66      |         |
|                |                                                             |               |          | FI at <i>m/z</i>                                   | 145.0282 | 9                                         | 145.0284                            | C9H5O2                | -1.42      |         |
| CM17           | trihydroxy                                                  | CYP           | pos      | PI at <i>m/z</i>                                   | 423.1554 | 14                                        | 423.1551                            | C23H23O6N2            | 0.80       | 7.1     |
|                |                                                             |               |          | FI at <i>m/z</i>                                   | 278.1025 | 14                                        | 278.1023                            | C14H16O5N             | 0.72       |         |
|                |                                                             |               |          | FI at <i>m/z</i>                                   | 163.0388 | 100                                       | 163.0390                            | C9H7O3                | -1.04      |         |
|                |                                                             |               |          | FI at <i>m/z</i>                                   | 100.0762 | 19                                        | 100.0757                            | C5H10ON               | 5.10       |         |
| CM18           | ester hydrolysis (carboxylic acid)                          | pHLS9/<br>CYP | pos      | PI at <i>m/z</i>                                   | 248.1281 | 100                                       | 248.1281                            | C14H18O3N             | -0.08      | 7.0     |
|                |                                                             |               |          | FI at <i>m/z</i>                                   | 163.0389 | 67                                        | 163.0390                            | C9H7O3                | -0.43      |         |
|                |                                                             |               |          | FI at <i>m/z</i>                                   | 112.0760 | 7                                         | 112.0757                            | C6H10ON               | 2.77       |         |
|                |                                                             |               |          | FI at <i>m/z</i>                                   | 69.0706  | 10                                        | 69.0699                             | C5H9                  | 10.47      |         |
|                |                                                             | pHLS9/<br>CYP | neg      | PI at <i>m/z</i>                                   | 246.1131 | 71                                        | 246.1136                            | C14H16O3N             | -1.90      |         |
|                |                                                             |               |          | FI at <i>m/z</i>                                   | 202.1228 | 100                                       | 202.1237                            | C13H16ON              | -4.64      |         |
| CM19           | ester hydrolysis (carboxylic acid) + <i>N,N</i> -bisdealkyl | CYP           | pos      | PI at <i>m/z</i>                                   | 180.0654 | 100                                       | 180.0655                            | C9H10O3N              | -0.67      | 0.6     |
|                |                                                             |               |          | FI at <i>m/z</i>                                   | 162.0547 | 69                                        | 162.0550                            | C9H8O2N               | -1.57      |         |
|                |                                                             |               |          | FI at <i>m/z</i>                                   | 134.0599 | 24                                        | 134.0600                            | C8H8ON                | -1.04      |         |
| CM20           | ester hydrolysis (carboxylic acid) + dehydro (isomer 1)     | CYP           | pos      | PI at <i>m/z</i>                                   | 246.1118 | 3                                         | 246.1125                            | C14H16O3N             | -2.72      | 6.3     |
|                |                                                             |               |          | FI at <i>m/z</i>                                   | 163.0387 | 100                                       | 163.0390                            | C8H7O3                | -1.66      |         |
|                |                                                             |               |          | FI at <i>m/z</i>                                   | 135.0440 | 15                                        | 135.0441                            | C8H7O2                | -0.41      |         |
| CM21           | ester hydrolysis (carboxylic acid) + dehydro (isomer 2)     | CYP           | pos      | PI at <i>m/z</i>                                   | 246.1121 | 41                                        | 246.1125                            | C14H16O3N             | -1.50      | 7.3     |
|                |                                                             |               |          | FI at <i>m/z</i>                                   | 145.0282 | 100                                       | 145.0284                            | C9H5O2                | -1.42      |         |
|                |                                                             |               |          | FI at <i>m/z</i>                                   | 117.0336 | 20                                        | 117.0335                            | C8H5O                 | 0.93       |         |
|                |                                                             | CYP           | neg      | PI at <i>m/z</i>                                   | 244.0971 | 55                                        | 244.0979                            | C14H14O3N             | -3.35      |         |
|                |                                                             |               |          | FI at <i>m/z</i>                                   | 200.1070 | 100                                       | 200.1081                            | C13H14ON              | -5.44      |         |

Table S2. (continued)

| Meta-bolite ID | Metabolite                                                | Incubation    | ESI Mode | Measured Masses of Characteristic Ions, <i>m/z</i> |              | Relative Intensity in MS <sup>2</sup> , % | Calculated Exact Masses, <i>m/z</i> | Elemental Composition | Error, ppm | RT, min |
|----------------|-----------------------------------------------------------|---------------|----------|----------------------------------------------------|--------------|-------------------------------------------|-------------------------------------|-----------------------|------------|---------|
| CM22           | ester hydrolysis (carboxylic acid) + hydroxy + dehydro    | CYP           | pos      | PI at <i>m/z</i>                                   | 262.1070     | 18                                        | 262.1074                            | C14H16O4N             | -1.47      | 5.4     |
|                |                                                           |               |          | FI at <i>m/z</i>                                   | 163.0387     | 100                                       | 163.0390                            | C9H7O3                | -1.66      |         |
|                |                                                           |               |          | FI at <i>m/z</i>                                   | 135.0439     | 10                                        | 135.0441                            | C8H7O2                | -1.16      |         |
|                |                                                           |               |          | FI at <i>m/z</i>                                   | 107.0493     | 6                                         | 107.0491                            | C7H7O                 | 1.49       |         |
| CM23           | ester hydrolysis (carboxylic acid) + hydroxy (isomer 1)   | pHLS9/<br>CYP | pos      | PI at <i>m/z</i>                                   | 264.1231     | 29                                        | 264.1230                            | C14H18O4N             | 0.25       | 5.4     |
|                |                                                           |               |          | FI at <i>m/z</i>                                   | 163.0390     | 100                                       | 163.0390                            | C9H7O3                | 0.18       |         |
|                |                                                           |               |          | FI at <i>m/z</i>                                   | 135.0442     | 7                                         | 135.0441                            | C8H7O2                | 1.07       |         |
|                |                                                           |               |          | FI at <i>m/z</i>                                   | 91.0549      | 11                                        | 91.0542                             | C7H7                  | 7.39       |         |
|                |                                                           | pHLS9/<br>CYP | neg      | PI at <i>m/z</i>                                   | 262.1076     | 57                                        | 262.1085                            | C14H16O4N             | -3.37      |         |
|                |                                                           |               |          | FI at <i>m/z</i>                                   | 134.0596     | 100                                       | 134.0611                            | C8H8ON                | -11.46     |         |
| CM24           | ester hydrolysis (carboxylic acid) + hydroxy (isomer 2)   | CYP           | pos      | PI at <i>m/z</i>                                   | 264.1226     | 21                                        | 264.1230                            | C14H18O4N             | -1.64      | 5.7     |
|                |                                                           |               |          | FI at <i>m/z</i>                                   | 246.1123     | 54                                        | 246.1125                            | C14H16O3N             | -0.69      |         |
|                |                                                           |               |          | FI at <i>m/z</i>                                   | 163.0388     | 100                                       | 163.0390                            | C9H7O3                | -1.04      |         |
|                |                                                           |               |          | FI at <i>m/z</i>                                   | 135.0442     | 9                                         | 135.0441                            | C8H7O2                | 1.07       |         |
|                |                                                           |               |          | FI at <i>m/z</i>                                   | 84.0812      | 13                                        | 84.0808                             | C5H10N                | 5.04       |         |
|                |                                                           | CYP           | neg      | PI at <i>m/z</i>                                   | 262.1080     | 100                                       | 262.1085                            | C14H16O4N             | -1.84      |         |
|                |                                                           |               |          | FI at <i>m/z</i>                                   | 218.1172     | 21                                        | 218.1187                            | C13H16O2N             | -6.66      |         |
|                |                                                           |               |          | FI at <i>m/z</i>                                   | 148.0753     | 39                                        | 148.0768                            | C9H10ON               | -10.05     |         |
|                |                                                           |               |          | FI at <i>m/z</i>                                   | 119.0487     | 50                                        | 119.0502                            | C8H7O                 | -12.92     |         |
|                |                                                           |               |          | FI at <i>m/z</i>                                   | 91.0538      | 11                                        | 91.0553                             | C7H7                  | -16.74     |         |
| CM25           | ester hydrolysis (carboxylic acid) + hydroxy (isomer 3)   | pHLS9/<br>CYP | pos      | PI at <i>m/z</i>                                   | 264.1229     | 2                                         | 264.1230                            | C14H18O4N             | -0.51      | 6.3     |
|                |                                                           |               |          | FI at <i>m/z</i>                                   | 246.1122     | 10                                        | 246.1125                            | C14H16O3N             | -1.10      |         |
|                |                                                           |               |          | FI at <i>m/z</i>                                   | 163.0387     | 100                                       | 163.0390                            | C9H7O3                | -1.66      |         |
|                |                                                           |               |          | FI at <i>m/z</i>                                   | 135.0440     | 9                                         | 135.0441                            | C8H7O2                | -0.41      |         |
|                |                                                           |               |          | FI at <i>m/z</i>                                   | 84.0813      | 5                                         | 84.0808                             | C5H10N                | 6.23       |         |
|                |                                                           | pHLS9/<br>CYP | neg      | PI at <i>m/z</i>                                   | 262.1082     | 100                                       | 262.1085                            | C14H16O4N             | -1.08      |         |
|                |                                                           |               |          | FI at <i>m/z</i>                                   | 218.1179     | 29                                        | 218.1187                            | C13H16O2N             | -3.45      |         |
|                |                                                           |               |          | FI at <i>m/z</i>                                   | 134.0597     | 18                                        | 134.0611                            | C8H8ON                | -10.72     |         |
|                |                                                           |               |          | FI at <i>m/z</i>                                   | 119.0488     | 96                                        | 119.0502                            | C8H7O                 | -12.08     |         |
|                |                                                           |               |          | FI at <i>m/z</i>                                   | 91.0538      | 11                                        | 91.0553                             | C7H7                  | -16.74     |         |
| CM26           | ester hydrolysis (carboxylic acid) + dihydroxy (isomer 1) | CYP           | pos      | PI at <i>m/z</i>                                   | Not detected | 0                                         | 280.1179                            | C14H18O5N             | -          | 5.0     |
|                |                                                           |               |          | FI at <i>m/z</i>                                   | 262.1075     | 18                                        | 262.1074                            | C14H16O4N             | 0.44       |         |
|                |                                                           |               |          | FI at <i>m/z</i>                                   | 163.0385     | 100                                       | 163.0390                            | C9H7O3                | -2.88      |         |
|                |                                                           |               |          | FI at <i>m/z</i>                                   | 149.0232     | 61                                        | 149.0233                            | C8H5O3                | -0.81      |         |



Table S2. (continued)

| Meta-bolite ID | Metabolite                                                | Incubation    | ESI Mode | Measured Masses of Characteristic Ions, <i>m/z</i> |          | Relative Intensity in MS <sup>2</sup> , % | Calculated Exact Masses, <i>m/z</i> | Elemental Composition | Error, ppm | RT, min |
|----------------|-----------------------------------------------------------|---------------|----------|----------------------------------------------------|----------|-------------------------------------------|-------------------------------------|-----------------------|------------|---------|
| CM27           | ester hydrolysis (carboxylic acid) + dihydroxy (isomer 2) | CYP           | neg      | PI at <i>m/z</i>                                   | 278.1021 | 39                                        | 278.1034                            | C14H16O5N             | -4.66      | 5.0     |
|                |                                                           |               |          | FI at <i>m/z</i>                                   | 178.0499 | 75                                        | 178.0510                            | C9H8O3N               | -5.99      |         |
|                |                                                           |               |          | FI at <i>m/z</i>                                   | 134.0597 | 100                                       | 134.0611                            | C8H8ON                | -10.72     |         |
| CM28           | ester hydrolysis (carboxylic acid) + dihydroxy (isomer 3) | pHLS9/<br>CYP | neg      | PI at <i>m/z</i>                                   | 278.1031 | 100                                       | 278.1034                            | C14H16O5N             | -1.06      | 5.7     |
|                |                                                           |               |          | FI at <i>m/z</i>                                   | 260.0924 | 26                                        | 260.0928                            | C14H14O4N             | -1.66      |         |
|                |                                                           |               |          | FI at <i>m/z</i>                                   | 216.1023 | 44                                        | 216.1030                            | C13H14O2N             | -3.25      |         |
|                |                                                           |               |          | FI at <i>m/z</i>                                   | 198.0912 | 24                                        | 198.0924                            | C13H12ON              | -6.25      |         |
|                |                                                           |               |          | FI at <i>m/z</i>                                   | 134.0596 | 28                                        | 134.0611                            | C8H8ON                | -11.46     |         |
|                |                                                           |               |          | FI at <i>m/z</i>                                   | 91.0538  | 19                                        | 91.0553                             | C7H7                  | -16.74     |         |
| CM29           | ester hydrolysis (carboxylic acid) + gluc                 | pHLS9         | pos      | PI at <i>m/z</i>                                   | 424.1601 | 5                                         | 424.1602                            | C20H26O9N             | -0.25      | 6.1     |
|                |                                                           |               |          | FI at <i>m/z</i>                                   | 248.1281 | 100                                       | 248.1281                            | C14H18O3N             | -0.08      |         |
|                |                                                           |               |          | FI at <i>m/z</i>                                   | 230.1176 | 31                                        | 230.1176                            | C14H16O2N             | 0.20       |         |
|                |                                                           |               |          | FI at <i>m/z</i>                                   | 163.0389 | 30                                        | 163.0390                            | C9H7O3                | -0.43      |         |
|                |                                                           |               |          | FI at <i>m/z</i>                                   | 145.0284 | 15                                        | 145.0284                            | C9H5O2                | -0.04      |         |
|                |                                                           |               |          | FI at <i>m/z</i>                                   | 112.0760 | 4                                         | 112.0757                            | C6H10ON               | 2.77       |         |
|                |                                                           |               |          | FI at <i>m/z</i>                                   | 69.0706  | 4                                         | 69.0699                             | C5H9                  | 10.47      |         |
|                |                                                           | pHLS9         | neg      | PI at <i>m/z</i>                                   | 422.1459 | 6                                         | 422.1457                            | C20H24O9N             | 0.58       |         |
|                |                                                           |               |          | FI at <i>m/z</i>                                   | 246.1131 | 100                                       | 246.1136                            | C14H16O3N             | -1.90      |         |
|                |                                                           |               |          | FI at <i>m/z</i>                                   | 202.1228 | 88                                        | 202.1237                            | C13H16ON              | -4.64      |         |
|                |                                                           |               |          | FI at <i>m/z</i>                                   | 175.0236 | 12                                        | 175.0248                            | C6H7O6                | -6.92      |         |
|                |                                                           |               |          | FI at <i>m/z</i>                                   | 113.0229 | 43                                        | 113.0244                            | C5H5O3                | -13.43     |         |
|                |                                                           |               |          | FI at <i>m/z</i>                                   | 85.0280  | 41                                        | 85.0295                             | C4H5O2                | -17.68     |         |
| CM30           | ester hydrolysis (8-hydroxyquinoline)                     | pHLS9/<br>CYP | pos      | PI at <i>m/z</i>                                   | 146.0603 | 100                                       | 146.0600                            | C9H8ON                | 1.78       | 2.2     |
|                |                                                           |               |          | FI at <i>m/z</i>                                   | 118.0654 | 6                                         | 118.0651                            | C8H8N                 | 2.32       |         |
| CM31           | ester hydrolysis (8-hydroxyquinoline) + hydroxy           | CYP           | pos      | PI at <i>m/z</i>                                   | 162.0547 | 100                                       | 162.0550                            | C9H8O2N               | -1.57      | 1.2     |
|                |                                                           |               |          | FI at <i>m/z</i>                                   | 134.0599 | 7                                         | 134.0600                            | C8H8ON                | -1.04      |         |
| CM32           | ester hydrolysis (8-hydroxyquinoline) + sulfate           | pHLS9         | pos      | PI at <i>m/z</i>                                   | 226.0169 | 10                                        | 226.0169                            | C9H8O4NS              | 0.20       | 2.2     |
|                |                                                           |               |          | FI at <i>m/z</i>                                   | 146.0601 | 100                                       | 146.0600                            | C9H8ON                | 0.41       |         |
| CM33           | ester hydrolysis (8-hydroxyquinoline) + gluc              | pHLS9         | pos      | PI at <i>m/z</i>                                   | 322.0919 | 10                                        | 322.0921                            | C15H16O7N             | -0.71      | 1.5     |
|                |                                                           |               |          | FI at <i>m/z</i>                                   | 146.0600 | 100                                       | 146.0600                            | C9H8ON                | -0.27      |         |
|                |                                                           |               |          | FI at <i>m/z</i>                                   | 113.0237 | 4                                         | 113.0233                            | C5H5O3                | 3.36       |         |
| CM34           | ester hydrolysis (8-hydroxyquinoline) + hydroxy + gluc    | pHLS9         | pos      | PI at <i>m/z</i>                                   | 338.0864 | 12                                        | 338.0870                            | C15H16O8N             | -1.90      | 0.9     |
|                |                                                           |               |          | FI at <i>m/z</i>                                   | 162.0550 | 100                                       | 162.0550                            | C9H8O2N               | 0.28       |         |

**Table S3.** Detection of QMP SB metabolites in pHLS9 and monooxygenases activity screening incubations (chemical structures are given in Figure 2). SM, metabolites of QMP SB; CYP, cytochrome P450; FMO, flavin-containing monooxygenase; pHLM, pooled human liver microsomes; +, metabolite detected; -, metabolite not detected; gluc, glucuronic acid.

[illegible]

**Table S4.** Detection of QMPCB metabolites in pHLS9 and monooxygenases activity screening incubations (chemical structures are given in Figure 2). CM, metabolites of QMPCB; CYP, cytochrome P450; FMO, flavin-containing monooxygenase; pHLM, pooled human liver microsomes; +, metabolite detected; -, metabolite not detected; gluc, glucuronic acid.

| Metabolite |                                                             | pHLS9 | CYP |     |     |     |     |      |     |     |     |     | FMO3 | pHLM |
|------------|-------------------------------------------------------------|-------|-----|-----|-----|-----|-----|------|-----|-----|-----|-----|------|------|
|            |                                                             |       | 1A2 | 2A6 | 2B6 | 2C8 | 2C9 | 2C19 | 2D6 | 2E1 | 3A4 | 3A5 |      |      |
| CM1        | <i>N,N</i> -bisdealkyl                                      | -     | -   | -   | -   | -   | -   | -    | -   | -   | +   | +   | -    | +    |
| CM2        | carboxamide cleavage (carboxylic acid)                      | -     | -   | -   | -   | -   | -   | -    | -   | -   | +   | +   | -    | -    |
| CM3        | <i>N,N</i> -bisdealkyl + hydroxy                            | -     | -   | -   | -   | -   | -   | -    | -   | -   | +   | -   | -    | -    |
| CM4        | hydroxy + didehydro                                         | -     | -   | -   | -   | -   | -   | -    | -   | -   | +   | +   | -    | -    |
| CM5        | hydroxy + dehydro (isomer 1)                                | -     | -   | -   | -   | -   | +   | +    | -   | -   | +   | +   | -    | +    |
| CM6        | hydroxy + dehydro (isomer 2)                                | -     | -   | -   | -   | +   | -   | +    | -   | -   | -   | -   | -    | -    |
| CM7        | hydroxy + dehydro (isomer 3)                                | -     | -   | +   | -   | -   | +   | -    | -   | -   | +   | +   | -    | -    |
| CM8        | hydroxy (isomer 1)                                          | -     | -   | -   | +   | +   | +   | +    | -   | -   | -   | -   | -    | -    |
| CM9        | hydroxy (isomer 2)                                          | -     | +   | -   | -   | -   | -   | -    | +   | +   | +   | -   | -    | +    |
| CM10       | hydroxy (isomer 3)                                          | -     | -   | -   | +   | +   | +   | +    | -   | -   | -   | +   | -    | -    |
| CM11       | hydroxy (isomer 4)                                          | -     | +   | -   | -   | +   | +   | +    | +   | -   | -   | -   | -    | -    |
| CM12       | dihydroxy + dehydro (isomer 1)                              | -     | -   | -   | -   | -   | -   | -    | -   | -   | +   | +   | -    | +    |
| CM13       | dihydroxy + dehydro (isomer 2)                              | -     | -   | -   | -   | -   | -   | -    | -   | -   | +   | +   | -    | -    |
| CM14       | dihydroxy (isomer 1)                                        | -     | -   | -   | -   | +   | -   | +    | -   | -   | -   | -   | -    | -    |
| CM15       | dihydroxy (isomer 2)                                        | -     | -   | -   | -   | +   | -   | -    | -   | -   | -   | -   | -    | -    |
| CM16       | dihydroxy (isomer 3)                                        | -     | -   | -   | -   | +   | -   | +    | -   | -   | +   | +   | -    | +    |
| CM17       | trihydroxy                                                  | -     | -   | -   | -   | -   | -   | -    | -   | -   | +   | +   | -    | +    |
| CM18       | ester hydrolysis (carboxylic acid)                          | +     | +   | +   | +   | +   | +   | +    | +   | +   | +   | +   | +    | +    |
| CM19       | ester hydrolysis (carboxylic acid) + <i>N,N</i> -bisdealkyl | -     | +   | -   | -   | +   | -   | -    | -   | -   | -   | -   | -    | +    |
| CM20       | ester hydrolysis (carboxylic acid) + dehydro (isomer 1)     | -     | -   | -   | -   | -   | -   | -    | -   | -   | +   | +   | -    | +    |
| CM21       | ester hydrolysis (carboxylic acid) + dehydro (isomer 2)     | -     | -   | -   | +   | +   | +   | +    | -   | -   | +   | +   | -    | +    |
| CM22       | ester hydrolysis (carboxylic acid) + hydroxy + dehydro      | -     | -   | -   | -   | -   | -   | -    | -   | -   | +   | +   | -    | +    |
| CM23       | ester hydrolysis (carboxylic acid) + hydroxy (isomer 1)     | +     | -   | -   | +   | +   | +   | +    | -   | -   | +   | +   | -    | +    |

Table S4. (continued)

[illegible]

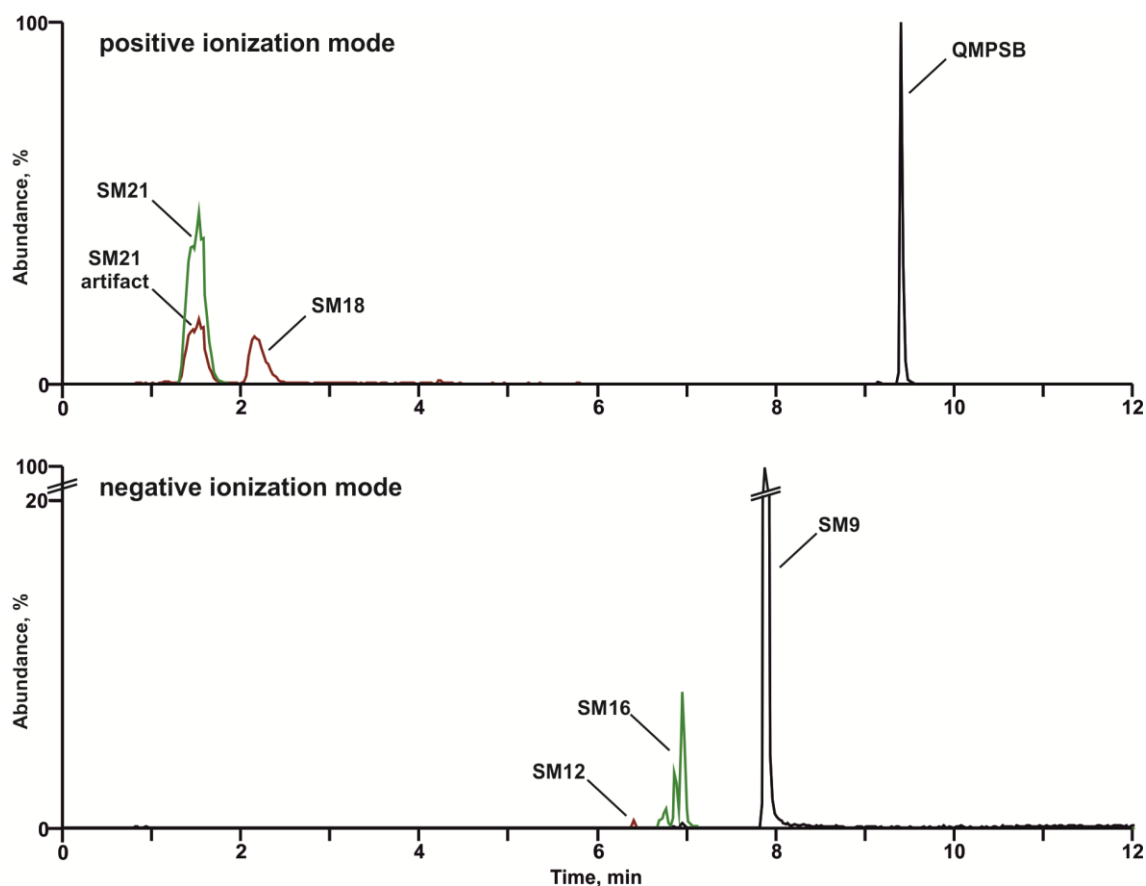

**Figure S1.** Chromatograms of QMPSB and its five most abundant metabolites in pHLS9 incubation (6h sample) in positive or negative ionization mode: QMPSB [ $m/z$  411.1373], SM9 [ester hydrolysis (carboxylic acid),  $m/z$  282.0806], SM12 [ester hydrolysis (carboxylic acid) + hydroxy (isomer 1),  $m/z$  298.0755], SM16 [ester hydrolysis (carboxylic acid) + glucuronic acid,  $m/z$  458.1126], SM18 [ester hydrolysis (8-hydroxyquinoline),  $m/z$  146.0600], SM21 [ester hydrolysis (8-hydroxyquinoline) + glucuronic acid,  $m/z$  322.0921]; SM21 artifact [deglycuronidated in ESI source,  $m/z$  146.0600].

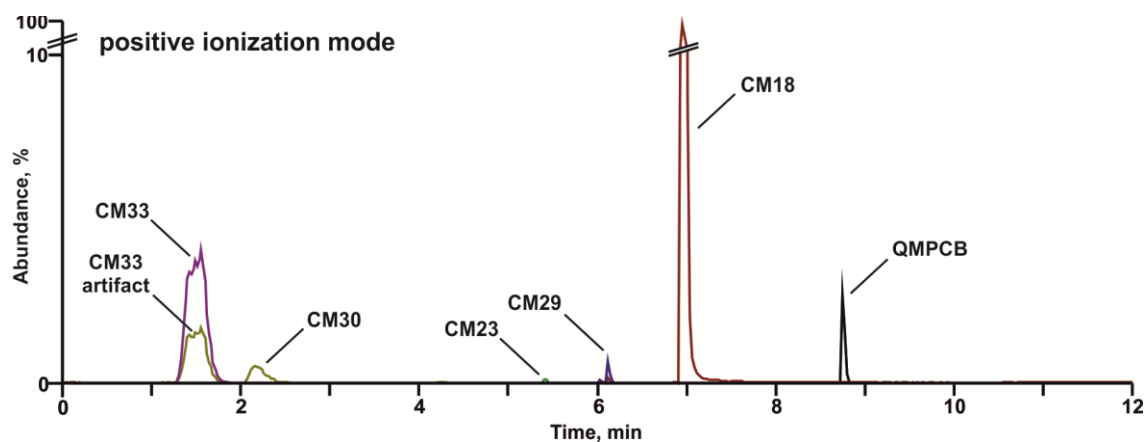

**Figure S2.** Chromatograms of QMPCB and its five most abundant metabolites in pHLS9 incubation (6h sample) in positive ionization mode: QMPCB [ $m/z$  375.1703], CM18 [ester hydrolysis (carboxylic acid),  $m/z$  248.1281], CM23 [ester hydrolysis (carboxylic acid) + hydroxy (isomer 1),  $m/z$  264.1230], CM29 [ester hydrolysis (carboxylic acid) + glucuronic acid,  $m/z$  424.1602], CM30 [ester hydrolysis (8-hydroxyquinoline),  $m/z$  146.0600], CM33 [ester hydrolysis (8-hydroxyquinoline) + glucuronic acid,  $m/z$  322.0921]; CM33 artifact [deglycuronidated in ESI source,  $m/z$  146.0600].

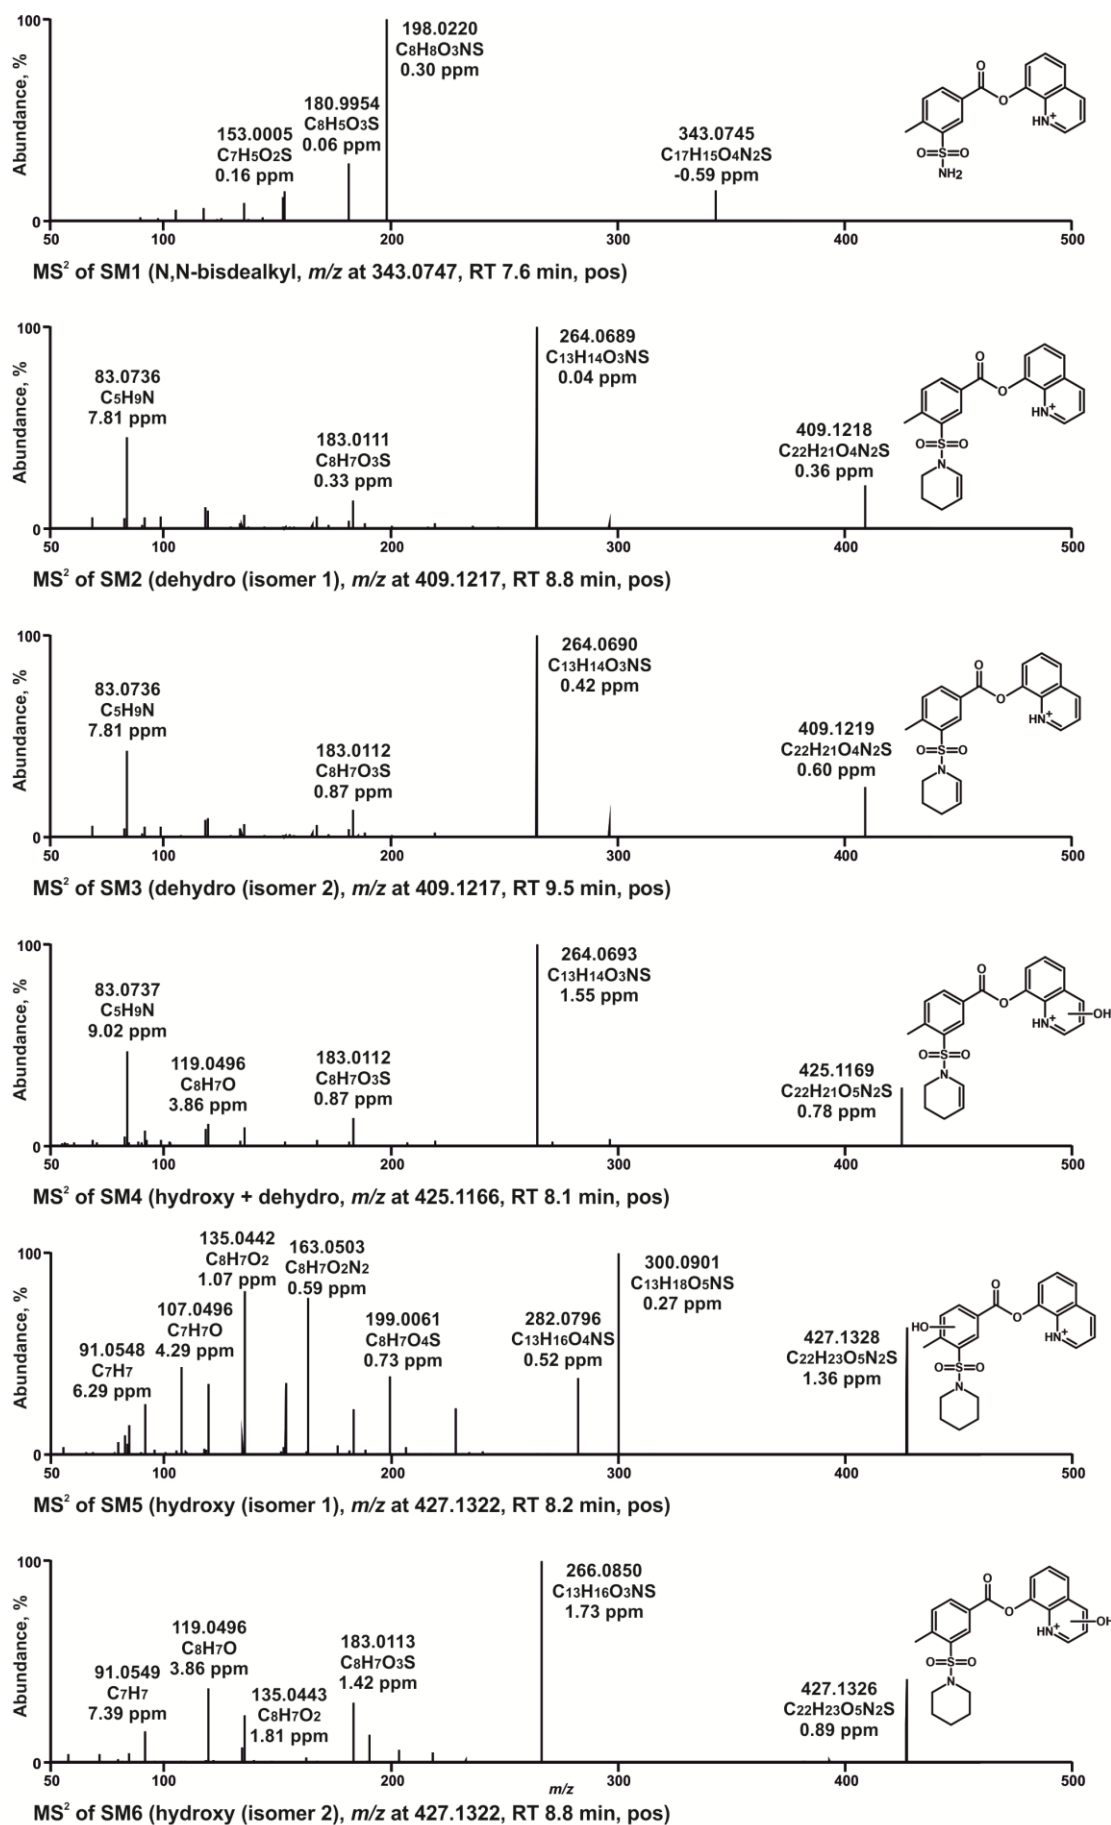

**Figure S3.** High-resolution MS<sup>2</sup> spectra of QMPSB metabolites detected in pHLS9 and monooxygenases activity screening. RT, retention time; pos, positive ionization mode; neg, negative ionization mode; gluc, glucuronic acid.

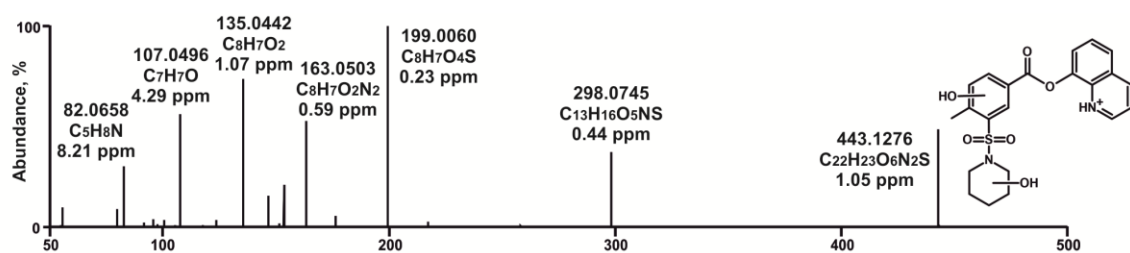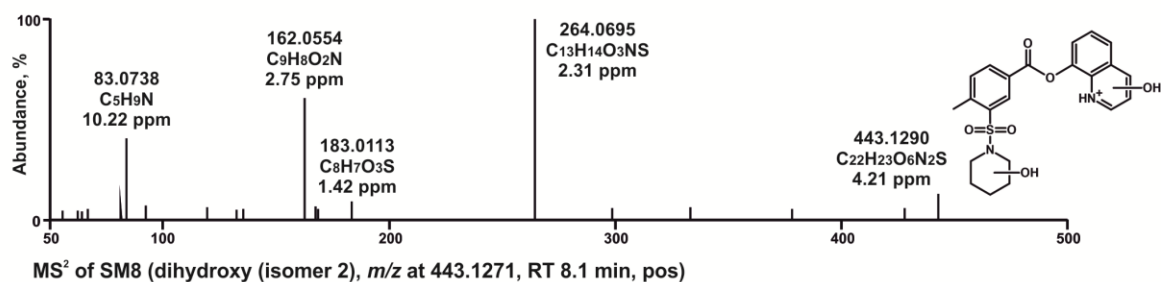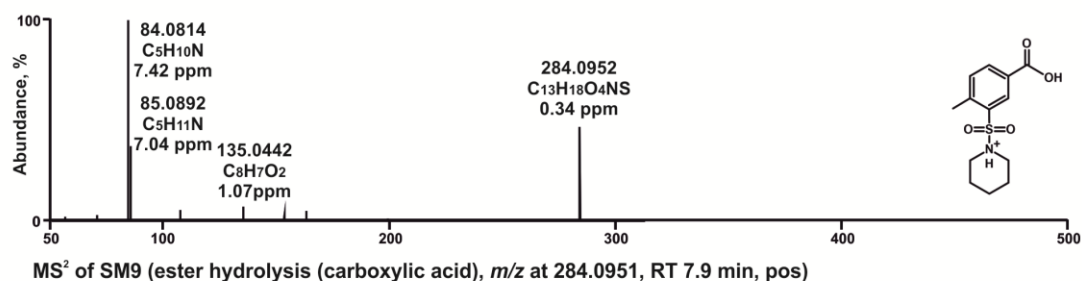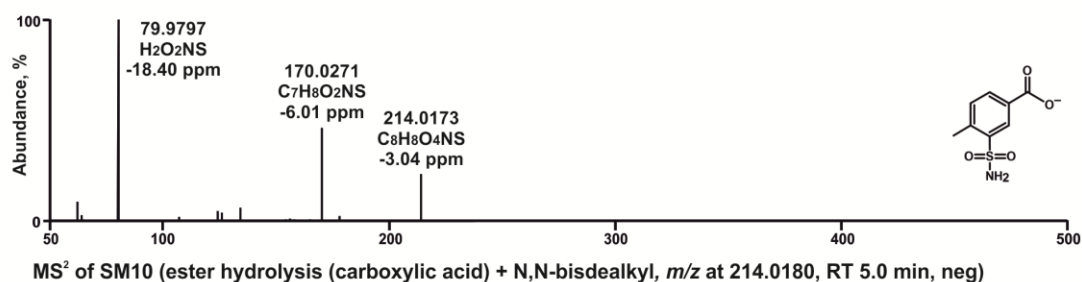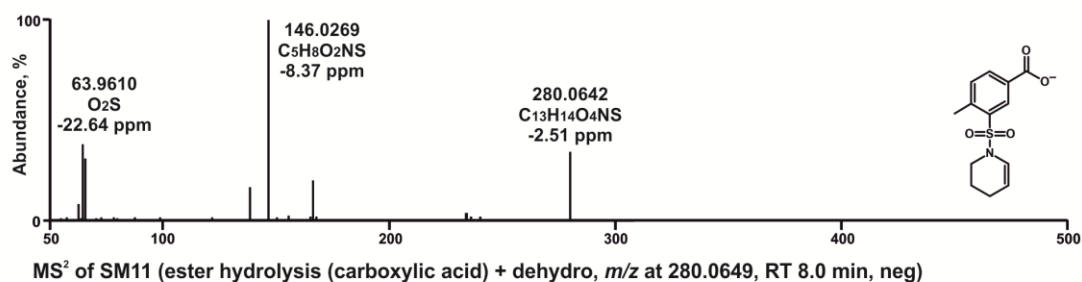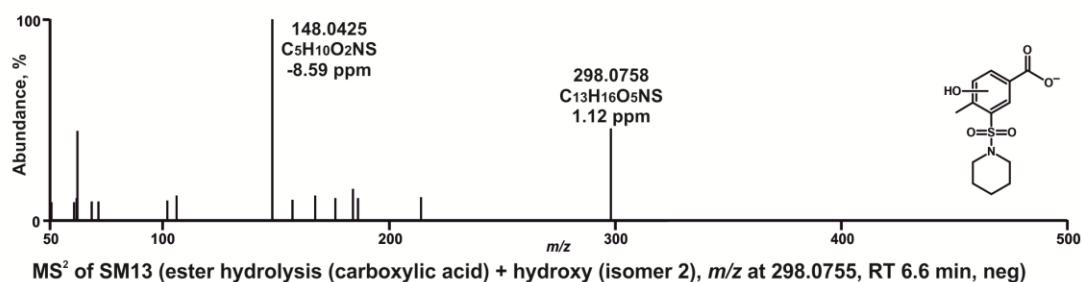

Figure S3. (continued)

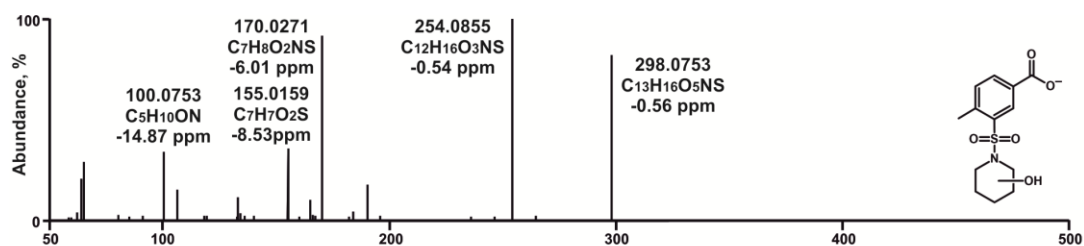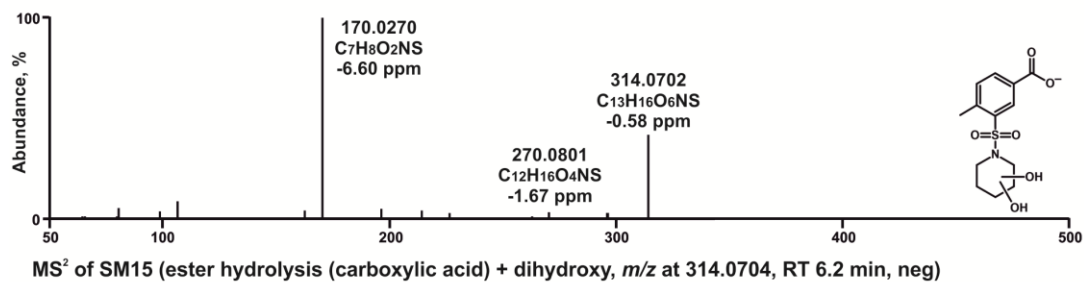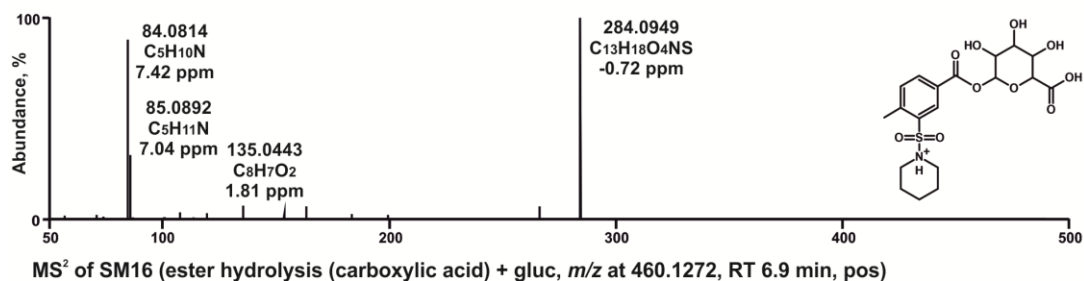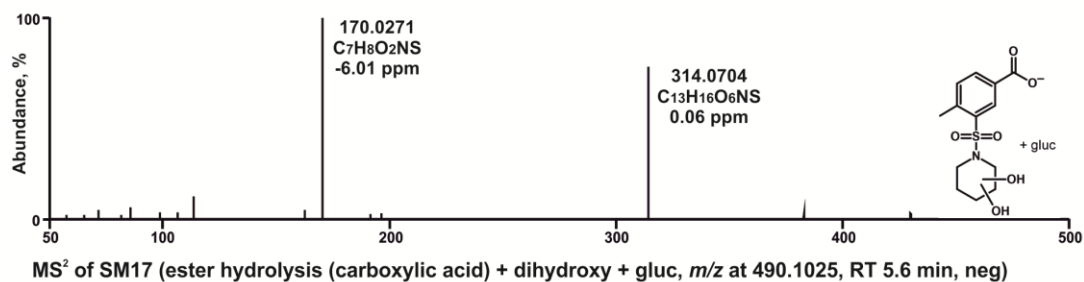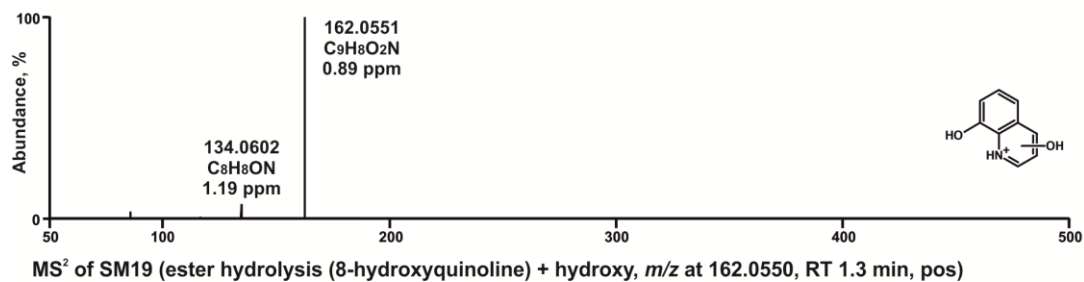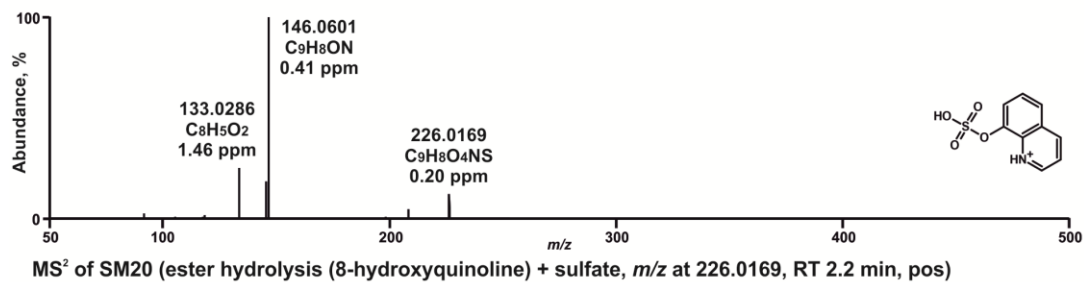

Figure S3. (continued)



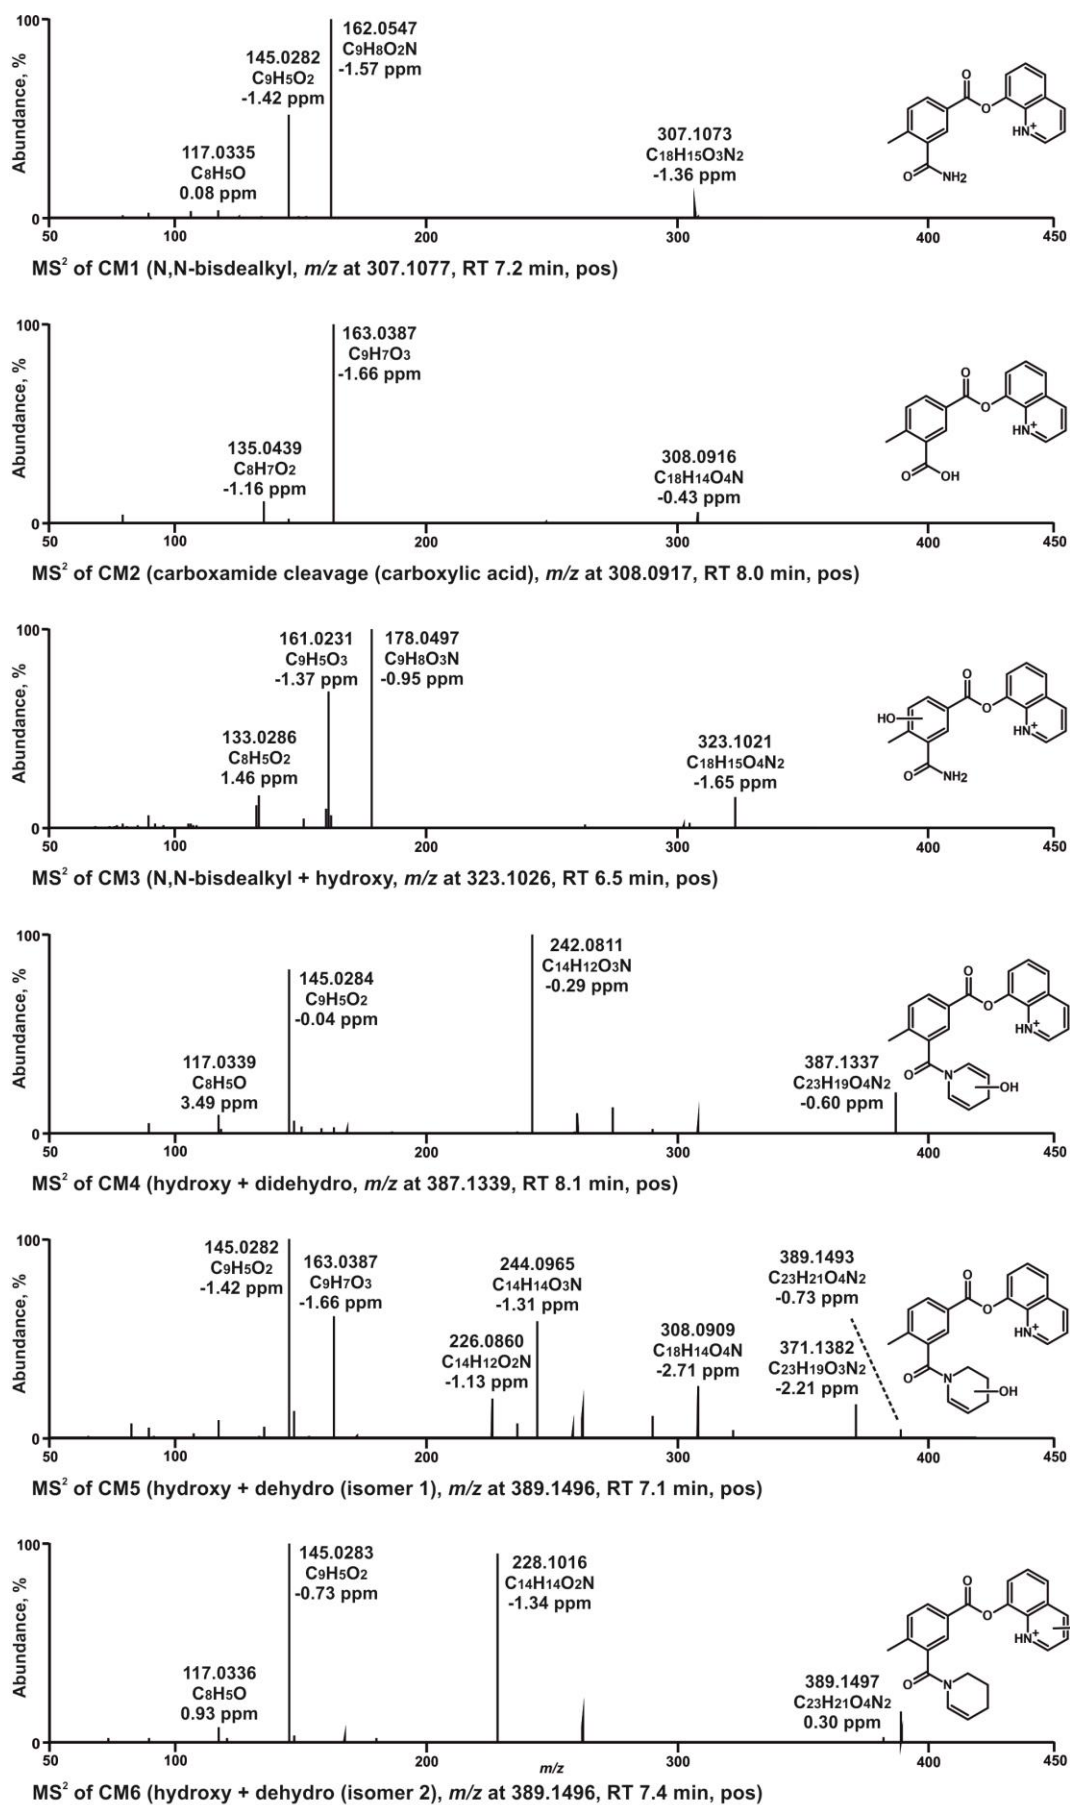

**Figure S4.** High-resolution MS<sup>2</sup> spectra of QMPCB metabolites detected in pHLS9 and monooxygenases activity screening. RT, retention time; pos, positive ionization mode; neg, negative ionization mode; gluc, glucuronic acid.

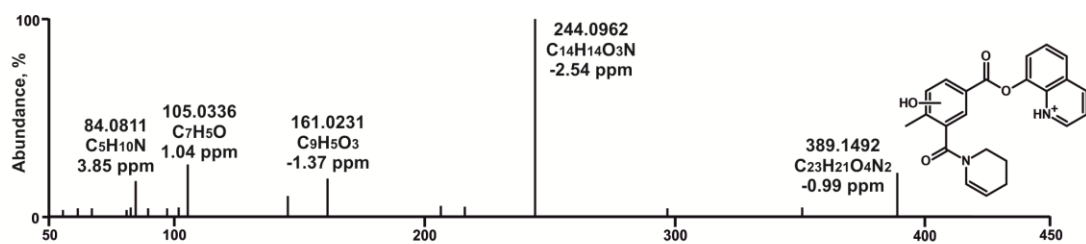

MS<sup>2</sup> of CM7 (hydroxy + dehydro (isomer 3), *m/z* at 389.1496, RT 8.6 min, pos)

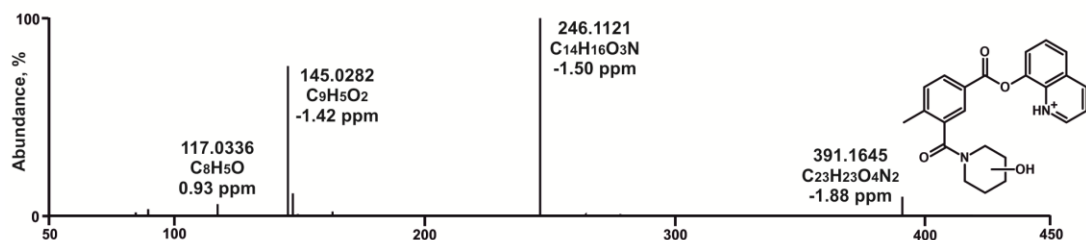

MS<sup>2</sup> of CM8 (hydroxy (isomer 1), *m/z* at 391.1652, RT 7.3 min, pos)

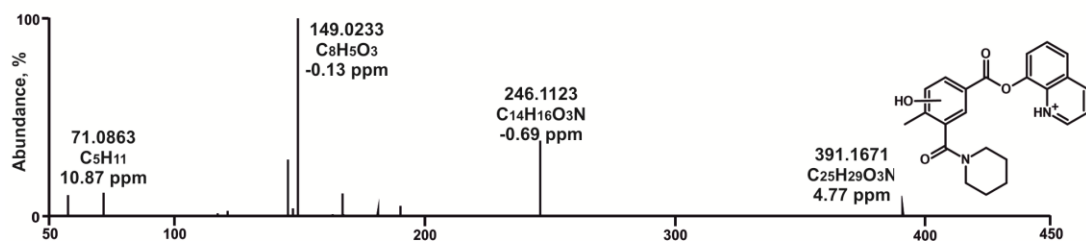

MS<sup>2</sup> of CM9 (hydroxy (isomer 2), *m/z* at 391.1652, RT 7.3 min, pos)

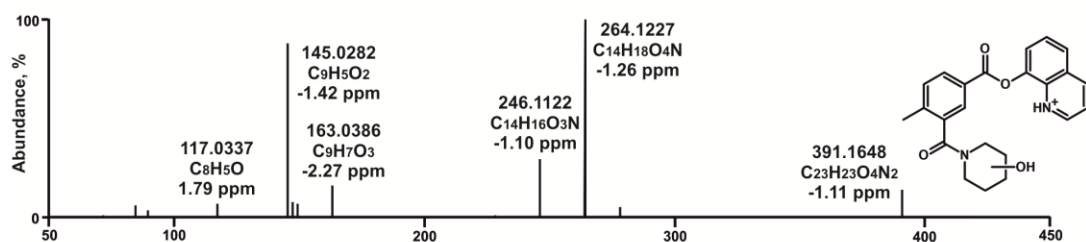

MS<sup>2</sup> of CM10 (hydroxy (isomer 3), *m/z* at 391.1652, RT 7.6 min, pos)

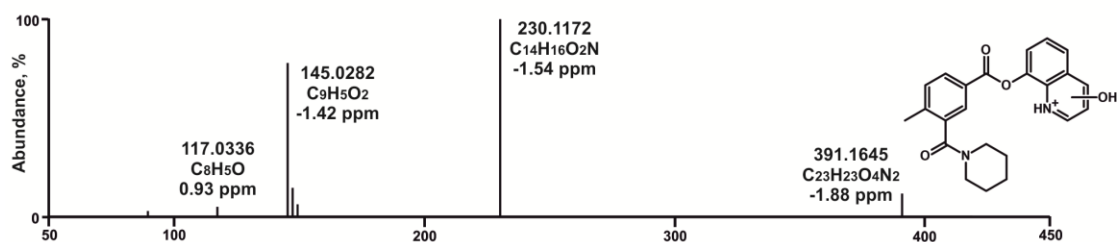

MS<sup>2</sup> of CM11 (hydroxy (isomer 4), *m/z* at 391.1652, RT 8.0 min, pos)

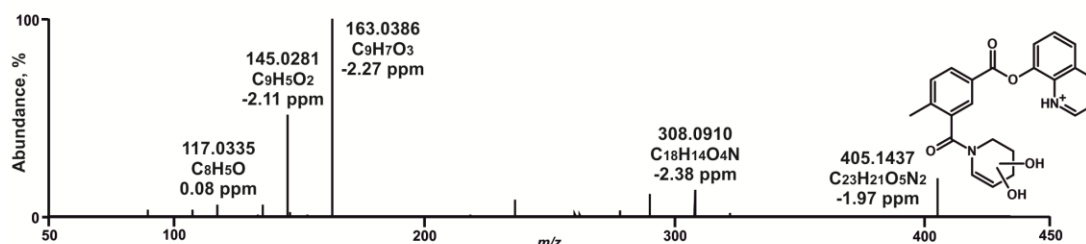

MS<sup>2</sup> of CM12 (dihydroxy + dehydro (isomer 1), *m/z* at 405.1445, RT 7.2 min, pos)

Figure S4. (continued)

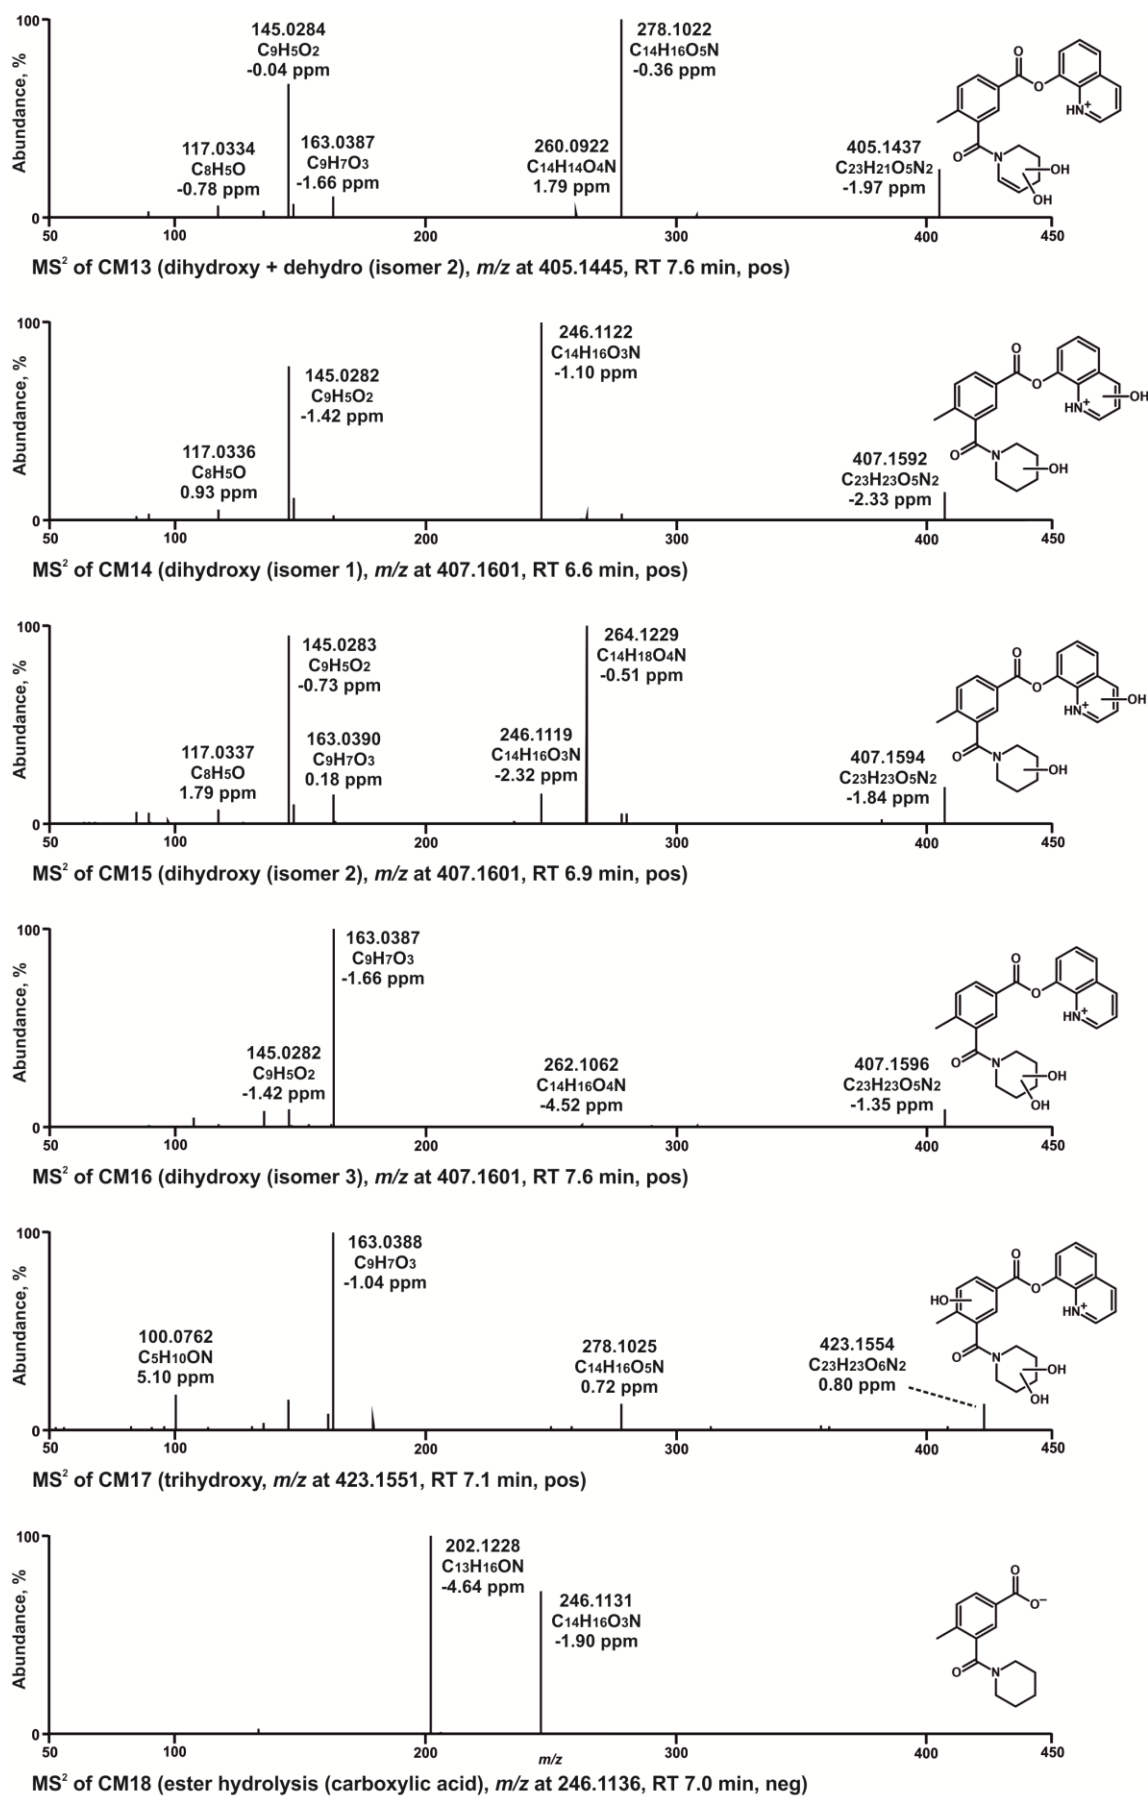

Figure S4. (continued)

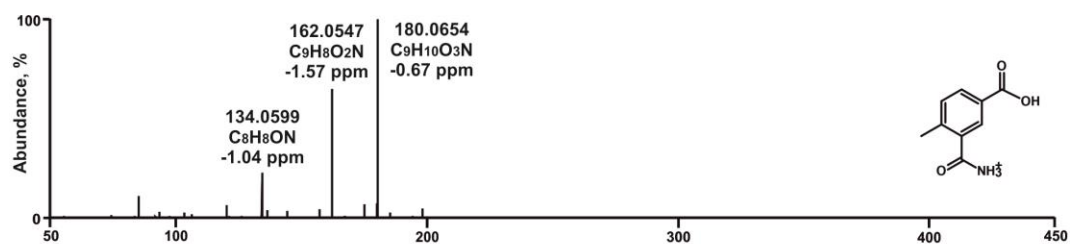

MS<sup>2</sup> of CM19 (ester hydrolysis (carboxylic acid) + N,N-bisdealkyl,  $m/z$  at 180.0655, RT 0.6 min, pos)

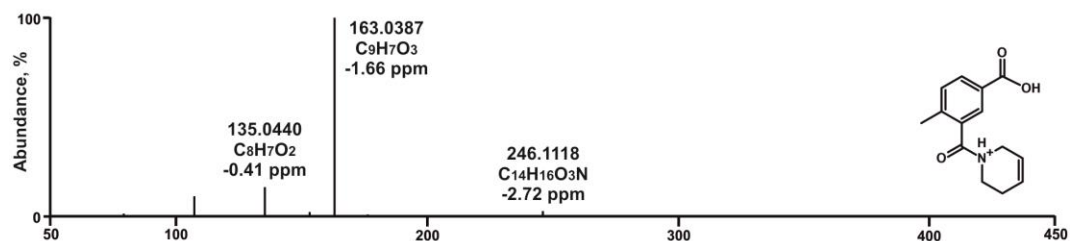

MS<sup>2</sup> of CM20 (ester hydrolysis (carboxylic acid) + dehydro (isomer 1),  $m/z$  at 246.1125, RT 6.3 min, pos)

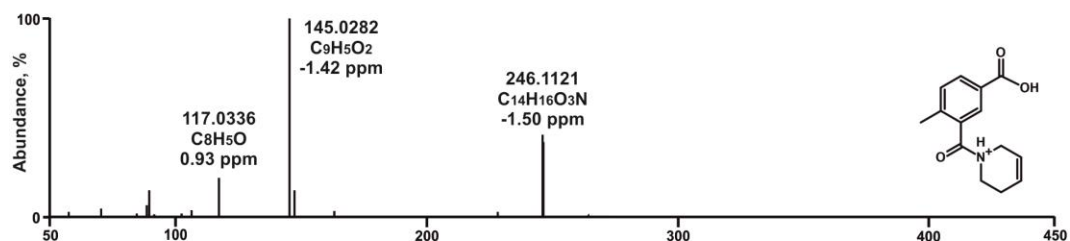

MS<sup>2</sup> of CM21 (ester hydrolysis (carboxylic acid) + dehydro (isomer 2),  $m/z$  at 246.1125, RT 7.3 min, pos)

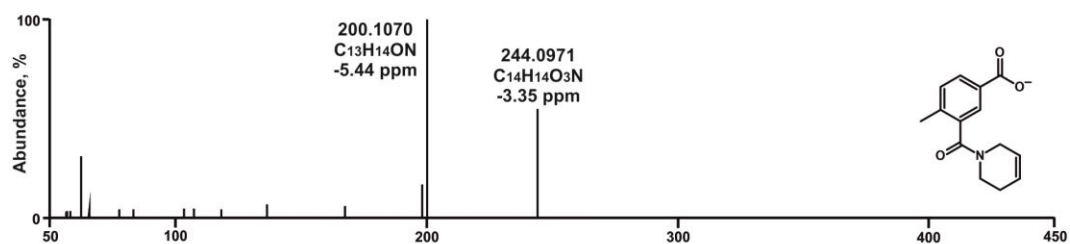

MS<sup>2</sup> of CM21 (ester hydrolysis (carboxylic acid) + dehydro (isomer 2),  $m/z$  at 244.0979, RT 7.3 min, neg)

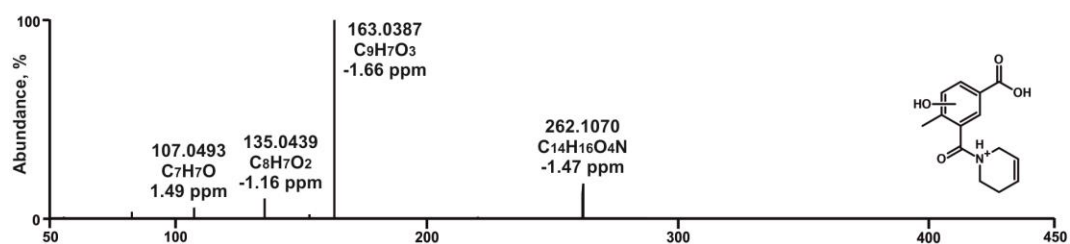

MS<sup>2</sup> of CM22 (ester hydrolysis (carboxylic acid) + hydroxy + dehydro,  $m/z$  at 262.1074, RT 5.4 min, pos)

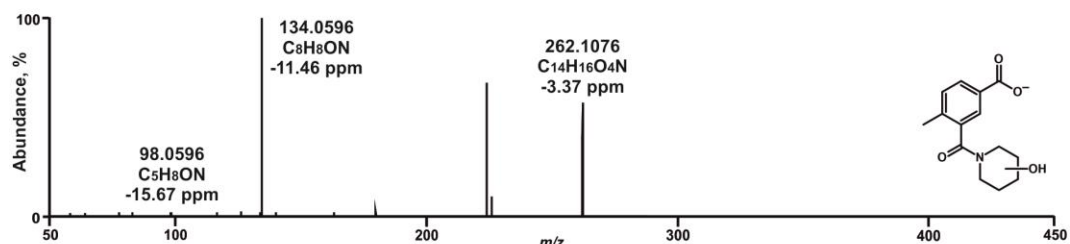

MS<sup>2</sup> of CM23 (ester hydrolysis (carboxylic acid) + hydroxy (isomer1),  $m/z$  at 262.1085, RT 5.4 min, neg)

Figure S4. (continued)

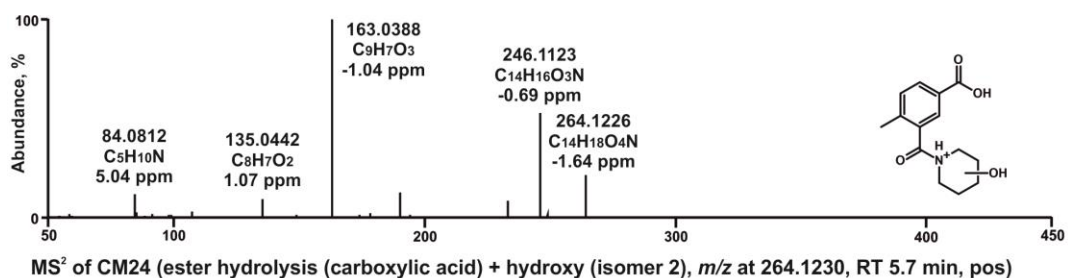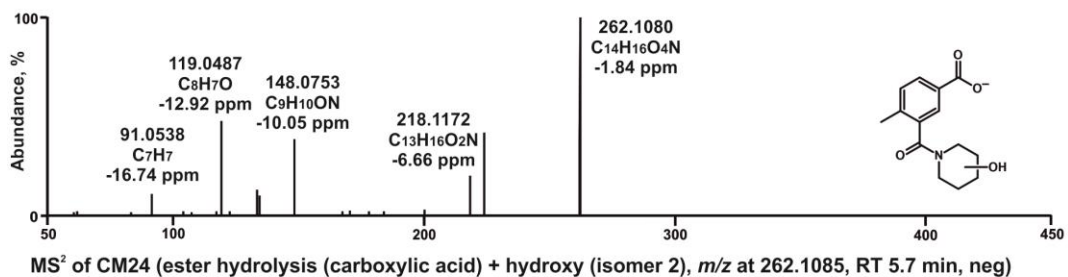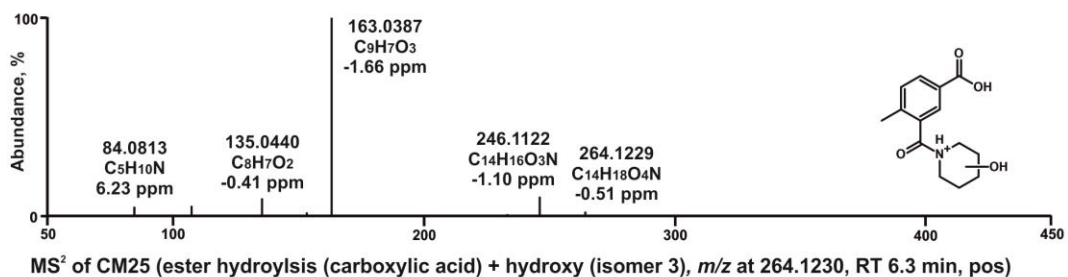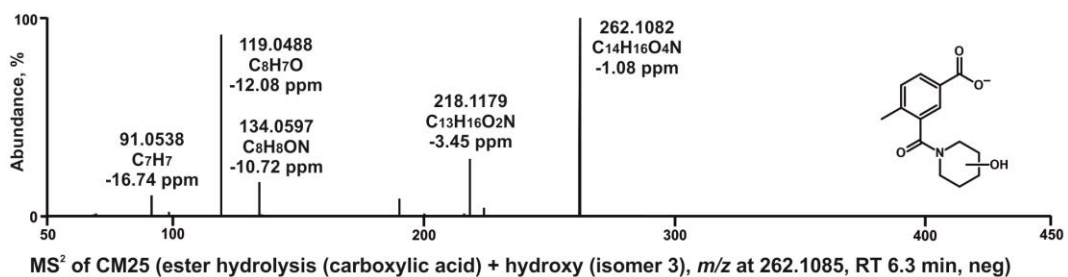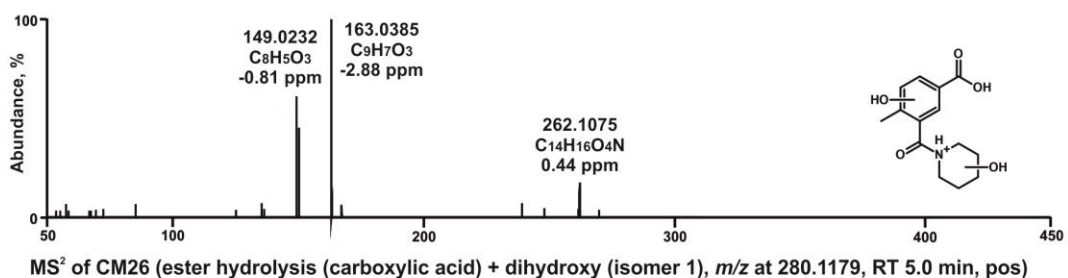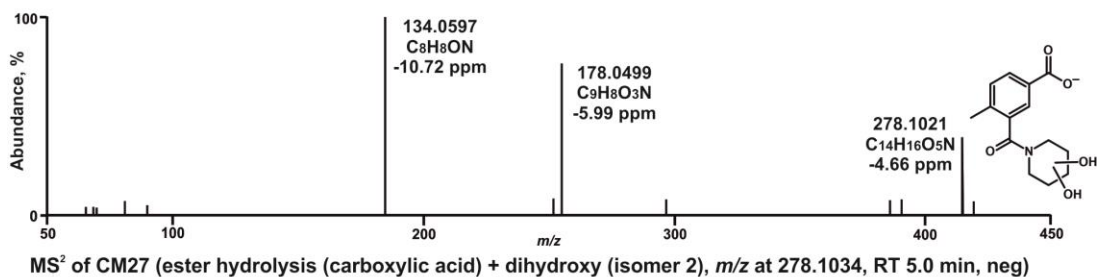

Figure S4. (continued)

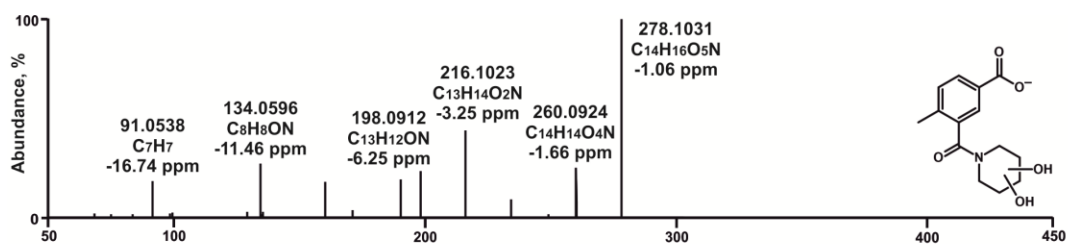

MS<sup>2</sup> of CM28 (ester hydrolysis (carboxylic acid) + dihydroxy (isomer 3),  $m/z$  at 278.1034, RT 5.7 min, neg)

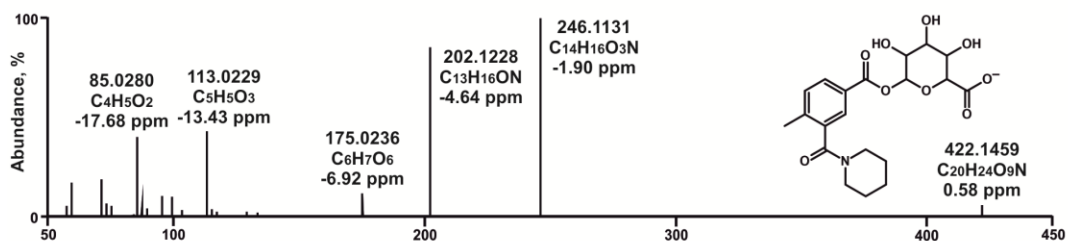

MS<sup>2</sup> of CM29 (ester hydrolysis (carboxylic acid) + gluc,  $m/z$  at 422.1457, RT 6.1 min, neg)

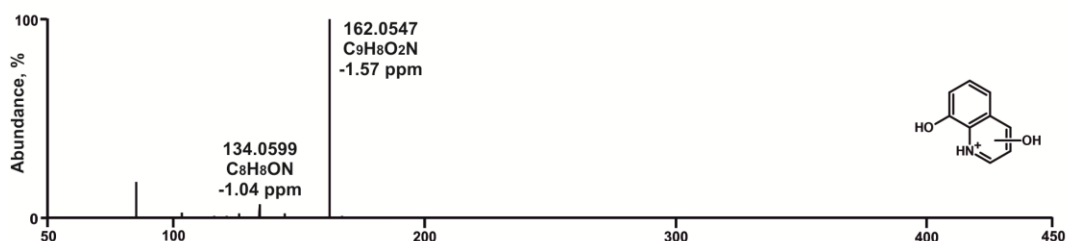

MS<sup>2</sup> of CM31 (ester hydrolysis (8-hydroxyquinoline) + hydroxy,  $m/z$  at 162.0550, RT 1.2 min, pos)

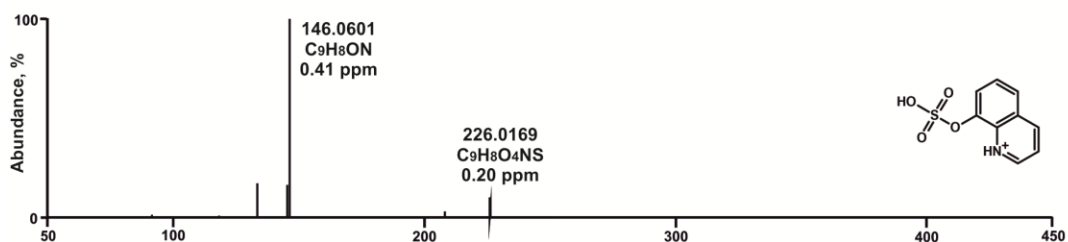

MS<sup>2</sup> of CM32 (ester hydrolysis (8-hydroxyquinoline) + sulfate,  $m/z$  at 226.0169, RT 2.2 min, pos)

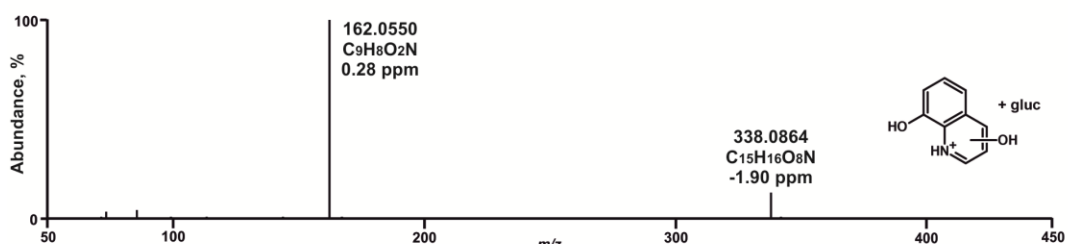

MS<sup>2</sup> of CM34 (ester hydrolysis (8-hydroxyquinoline) + hydroxy + gluc,  $m/z$  at 338.0870, RT 0.90 min, pos)

Figure S4. (continued)
